# Supplementary material for: Expansion and loss of sperm nuclear basic protein genes in Drosophila correspond with genetic conflicts between sex chromosomes
Source: eLife journal article supplement (doi:10.7554/elife.85249), 2023-01-12
Supplement: fig2-data2 [file elife-85249-fig2-data2-v1.pdf]

Bio-Rad 2022-04-15 15hr 05min

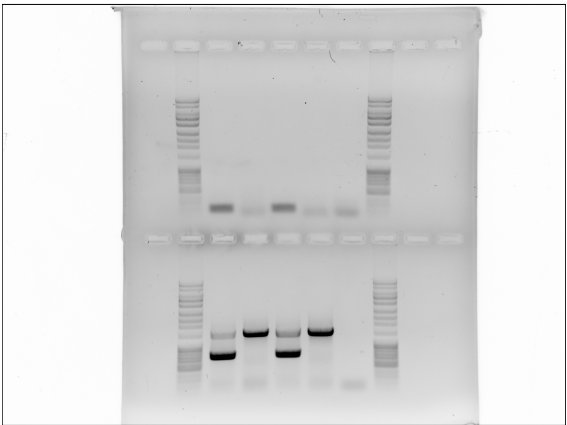

Location: C:/Users/Bio-Rad/Desktop/MALIK LAB/Ching-Ho  
Printed: 4/15/2022 3:06:40 PM

Page 1 of 1
