# Supplementary material for: Expansion and loss of sperm nuclear basic protein genes in Drosophila correspond with genetic conflicts between sex chromosomes
Source: eLife. 2023 Feb 10;12:e85249. doi: 10.7554/eLife.85249 (PMC9917458; doi:10.7554/eLife.85249)
Supplement: Supplementary file 1. — We conducted abSENSE analyses (Weisman et al., 2020) using the blast scores in related species with detected orthologs and inferred likely Blast scores of the orthologs in more related species given the divergence of species. Then we estimated the probability of failing to detect a homolog (if it were present) in species of various divergence levels (using E-value = 1). [file elife-85249-supp1.xlsx]

## Sheet: Sheet1
Supplementary file 1. Probability that rapid evolution has obscured homolog detection of young SNBP genes in Drosophila species.
# This file contains the probability of a homolog being undetected at the specified significance threshold (see run info file) in each tested gene in each species
Gene	D_melanogaster	D_simulans	D_sechelia	D_yakuba	D_erecta	D_ananassae	D_pseudoobscura	D_persimilis	D_willistoni	D_virilis	D_mojavensis	D_grimshawi
Prtl99C	Ortholog_detected	Ortholog_detected	Ortholog_detected	Ortholog_detected	Ortholog_detected	Ortholog_detected	Homolog_detected(orthology_ambiguous)	Homolog_detected(orthology_ambiguous)	Ortholog_detected	0.07	0.17	0.43
Mst77F	Ortholog_detected	Ortholog_detected	Ortholog_detected	Ortholog_detected	Ortholog_detected	Ortholog_detected	0.18	0.26	0.37	0.7	0.9	0.99
Mst33A	Ortholog_detected	Ortholog_detected	Ortholog_detected	Ortholog_detected	Ortholog_detected	Ortholog_detected	Homolog_detected(orthology_ambiguous)	Homolog_detected(orthology_ambiguous)	Ortholog_detected	0.1	0.35	0.85
Tpl94D	Ortholog_detected	Ortholog_detected	Ortholog_detected	Ortholog_detected	Ortholog_detected	Ortholog_detected	Ortholog_detected	Ortholog_detected	0.42	0.68	0.85	0.98
CG42355	Ortholog_detected	Ortholog_detected	Ortholog_detected	Ortholog_detected	Ortholog_detected	Ortholog_detected	0	0	0	0	0.01	0.05
