# Supplementary material for: Expansion and loss of sperm nuclear basic protein genes in Drosophila correspond with genetic conflicts between sex chromosomes
Source: eLife. 2023 Feb 10;12:e85249. doi: 10.7554/eLife.85249 (PMC9917458; doi:10.7554/eLife.85249)
Supplement: Supplementary file 4. — We used PAML to estimate evolutionary rates of SNBP genes using the same parameters and the same six Drosophila species used in the 12 Drosophila genomes project (Clark et al., 2007). For comparison, we used the evolutionary rates of other genes from the 12 Drosophila genomes project (Clark et al., 2007). [file elife-85249-supp4.xlsx]

## Sheet: Sheet1
Supplementary file 4. Evolutionary rates of SNBP genes in D. melanogaster subgroup species.
Name	dN/dS	dN	dS	Type	Gene presented in D. ananassae
FBgn0004603	0.01114	0.01433	1.28635	Other	T
FBgn0051481	0.08418	0.09061	1.07628	Other	T
FBgn0037360	0.06878	0.12528	1.82147	Other	T
FBgn0028436	0.05842	0.11427	1.95607	Other	T
FBgn0019637	0.0602	0.14195	2.35788	Other	T
FBgn0037406	0.06864	0.13324	1.94127	Other	T
FBgn0010355	0.03546	0.07973	2.24836	Other	T
FBgn0015324	0.04926	0.04664	0.94688	Other	T
FBgn0014963	0.05414	0.08534	1.57631	Other	T
FBgn0051561	0.07435	0.11038	1.48459	Other	T
FBgn0037373	0.03107	0.05117	1.64714	Other	T
FBgn0037409	0.05377	0.10349	1.92444	Other	T
FBgn0051550	0.07993	0.1384	1.73144	Other	T
FBgn0037332	0.10932	0.1587	1.45167	Other	T
FBgn0037382	0.0551	0.12401	2.25043	Other	T
FBgn0004879	0.03596	0.05777	1.6064	Other	T
FBgn0017550	0.09442	0.05405	0.57241	Other	T
FBgn0037421	0.27466	0.23215	0.84523	Other	T
FBgn0046222	0.03243	0.0648	1.99846	Other	T
FBgn0037445	0.10171	0.15801	1.55349	Other	T
FBgn0037462	0.09305	0.21033	2.26035	Other	T
FBgn0027497	0.03495	0.04747	1.35799	Other	T
FBgn0027951	0.04587	0.0429	0.93519	Other	T
FBgn0037405	0.18426	0.34649	1.88039	Other	T
FBgn0037449	0.70536	0.92616	1.31303	Other	T
FBgn0037344	0.13143	0.23086	1.75655	Other	T
FBgn0037379	0.09928	0.15717	1.58308	Other	T
FBgn0053324	0.06267	0.09346	1.49114	Other	T
FBgn0037443	0.04717	0.04522	0.95862	Other	T
FBgn0026565	0.06881	0.13507	1.96288	Other	T
FBgn0037372	0.07338	0.15613	2.12764	Other	T
FBgn0014001	0.0389	0.04642	1.19326	Other	T
FBgn0010772	0.06787	0.11514	1.69659	Other	T
FBgn0004878	0.08091	0.1055	1.30387	Other	T
FBgn0037442	0.12249	0.14063	1.14809	Other	T
FBgn0037387	0.04066	0.06647	1.63482	Other	T
FBgn0037347	0.10877	0.20916	1.923	Other	T
FBgn0027514	0.07746	0.1812	2.33919	Other	T
FBgn0037348	0.10152	0.26653	2.62548	Other	T
FBgn0037377	0.0978	0.17955	1.83586	Other	T
FBgn0037363	0.08197	0.13697	1.67103	Other	T
FBgn0037439	0.08178	0.18578	2.27163	Other	T
FBgn0037369	0.09032	0.21674	2.39973	Other	T
FBgn0037370	0.05958	0.10788	1.81063	Other	T
FBgn0037448	0.0745	0.11022	1.47938	Other	T
FBgn0037386	0.1242	0.25952	2.08958	Other	T
FBgn0000552	0.18809	0.2591	1.3775	Other	T
FBgn0004777	0.04328	0.04024	0.92994	Other	T
FBgn0004779	0.12294	0.11423	0.92916	Other	T
FBgn0004781	0.05833	0.09275	1.59009	Other	T
FBgn0010282	0.01386	0.04708	3.39624	Other	T
FBgn0010399	0.01376	0.01792	1.30226	Other	T
FBgn0010403	0.0417	0.11921	2.85872	Other	T
FBgn0011281	0.04419	0.04809	1.08815	Other	T
FBgn0014342	0.4327	0.57987	1.34011	Other	T
FBgn0014366	0.0073	0.02371	3.24703	Other	T
FBgn0015276	0.05236	0.09895	1.88971	Other	T
FBgn0015402	0.04812	0.09703	2.01656	Other	T
FBgn0023023	0.01411	0.02057	1.45744	Other	T
FBgn0024912	0.23696	0.44675	1.88532	Other	T
FBgn0026077	0.01199	0.00998	0.83213	Other	T
FBgn0026566	0.07713	0.15085	1.95576	Other	T
FBgn0026567	0.00338	0.0046	1.35922	Other	T
FBgn0027527	0.02907	0.02477	0.85229	Other	T
FBgn0027608	0.01725	0.0221	1.28136	Other	T
FBgn0028690	0.01737	0.04363	2.51226	Other	T
FBgn0029088	0.05453	0.10672	1.95713	Other	T
FBgn0037336	0.037	0.05133	1.38719	Other	T
FBgn0037340	0.10807	0.19021	1.76009	Other	T
FBgn0037341	0.13768	0.2243	1.62911	Other	T
FBgn0037342	0.01612	0.05607	3.47704	Other	T
FBgn0037346	0.04735	0.02671	0.56405	Other	T
FBgn0037350	0.21037	0.18119	0.86128	Other	T
FBgn0037351	0.00278	0.00199	0.71671	Other	T
FBgn0037357	0.00435	0.0063	1.44692	Other	T
FBgn0037358	0.00218	0.00426	1.95223	Other	T
FBgn0037359	0.01964	0.04076	2.07548	Other	T
FBgn0037364	0.01766	0.02369	1.34131	Other	T
FBgn0037365	0.18294	0.37494	2.0495	Other	T
FBgn0037366	0.09665	0.11244	1.16342	Other	T
FBgn0037368	0.12599	0.24221	1.92252	Other	T
FBgn0037371	0.04627	0.10189	2.20222	Other	T
FBgn0037374	0.01827	0.0306	1.6752	Other	T
FBgn0037375	0.03237	0.06225	1.92294	Other	T
FBgn0037376	0.02519	0.08133	3.22853	Other	T
FBgn0037378	0.1072	0.23257	2.1695	Other	T
FBgn0037380	0.03454	0.05448	1.57728	Other	T
FBgn0037381	0.11405	0.20872	1.83002	Other	T
FBgn0037383	0.02922	0.0615	2.10447	Other	T
FBgn0037385	0.1898	0.39211	2.06594	Other	T
FBgn0037391	0.01409	0.03587	2.54596	Other	T
FBgn0037395	0.0433	0.06684	1.54378	Other	T
FBgn0037399	0.13073	0.34522	2.64075	Other	T
FBgn0037402	0.1512	0.20571	1.36057	Other	T
FBgn0037408	0.04766	0.07439	1.56076	Other	T
FBgn0037410	0.04972	0.07231	1.45441	Other	T
FBgn0037411	0.02597	0.05954	2.29266	Other	T
FBgn0037412	0.05716	0.09438	1.65112	Other	T
FBgn0037413	0.11661	0.14246	1.22175	Other	T
FBgn0037415	0.06973	0.10703	1.53494	Other	T
FBgn0037416	0.01069	0.02098	1.96222	Other	T
FBgn0037417	0.10373	0.15508	1.49501	Other	T
FBgn0037418	0.06169	0.09655	1.56512	Other	T
FBgn0037419	0.04481	0.07529	1.67996	Other	T
FBgn0037422	0.15434	0.2501	1.62049	Other	T
FBgn0037424	0.04975	0.05714	1.14847	Other	T
FBgn0037428	0.03551	0.04844	1.364	Other	T
FBgn0037429	0.08082	0.07183	0.88868	Other	T
FBgn0037430	0.02705	0.03013	1.1135	Other	T
FBgn0037431	0.11616	0.28265	2.43323	Other	T
FBgn0037432	0.08199	0.14967	1.82553	Other	T
FBgn0037433	0.07947	0.16749	2.10751	Other	T
FBgn0037434	0.00556	0.01608	2.89374	Other	T
FBgn0037435	0.17172	0.28816	1.67808	Other	T
FBgn0037436	0.04451	0.11431	2.56842	Other	T
FBgn0037446	0.04872	0.14149	2.90411	Other	T
FBgn0037447	0.01338	0.02946	2.20151	Other	T
FBgn0037458	0.12134	0.28822	2.37528	Other	T
FBgn0040279	0.03743	0.043	1.14875	Other	T
FBgn0044823	0.03557	0.04061	1.14166	Other	T
FBgn0046875	0.10527	0.18755	1.78171	Other	T
FBgn0046876	0.12549	0.2427	1.93398	Other	T
FBgn0046878	0.17777	0.40417	2.27362	Other	T
FBgn0051546	0.04605	0.19829	4.30635	Other	T
FBgn0051548	0.02653	0.055	2.07347	Other	T
FBgn0051559	0.04838	0.06915	1.42936	Other	T
FBgn0032955	0.13552	0.22152	1.63462	Other	T
FBgn0032940	0.06736	0.11474	1.70334	Other	T
FBgn0011829	0.08918	0.15942	1.78766	Other	T
FBgn0032929	0.08934	0.14924	1.67052	Other	T
FBgn0051619	0.08951	0.13045	1.45732	Other	T
FBgn0022893	0.31483	0.2213	0.70291	Other	T
FBgn0032945	0.06419	0.11188	1.74301	Other	T
FBgn0032938	0.09539	0.1537	1.6113	Other	T
FBgn0010229	0.07191	0.11822	1.64399	Other	T
FBgn0026577	0.11062	0.20378	1.84228	Other	T
FBgn0041244	0.10654	0.18916	1.77543	Other	T
FBgn0023091	0.11292	0.18642	1.65099	Other	T
FBgn0016919	0.12073	0.22249	1.84293	Other	T
FBgn0023416	0.0669	0.10168	1.51983	Other	T
FBgn0000559	0.00987	0.01122	1.13702	Other	T
FBgn0021856	0.05545	0.10771	1.94229	Other	T
FBgn0032935	0.04357	0.0891	2.04515	Other	T
FBgn0032943	0.08043	0.12958	1.61111	Other	T
FBgn0032949	0.25889	0.42485	1.64106	Other	T
FBgn0032956	0.01415	0.02479	1.75203	Other	T
FBgn0032961	0.0668	0.10371	1.55256	Other	T
FBgn0032964	0.17709	0.39792	2.24701	Other	T
FBgn0033005	0.10923	0.25248	2.31137	Other	T
FBgn0040849	0.13713	0.22549	1.64442	Other	T
FBgn0013348	0.00085	0.00603	7.07167	Other	T
FBgn0033062	0.08912	0.15845	1.77803	Other	T
FBgn0033072	0.11604	0.2306	1.98726	Other	T
FBgn0033087	0.04559	0.09394	2.06067	Other	T
FBgn0033097	0.06306	0.14014	2.22221	Other	T
FBgn0028579	0.07624	0.14123	1.85237	Other	T
FBgn0033086	0.05287	0.11255	2.12905	Other	T
FBgn0033083	0.05265	0.118	2.24148	Other	T
FBgn0033051	0.13056	0.23743	1.81855	Other	T
FBgn0042085	0.07457	0.14227	1.90773	Other	T
FBgn0000546	0.0576	0.07016	1.2181	Other	T
FBgn0033058	0.05612	0.09733	1.73449	Other	T
FBgn0033068	0.02722	0.05377	1.97584	Other	T
FBgn0033061	0.0981	0.21249	2.1662	Other	T
FBgn0033073	0.09666	0.14308	1.48019	Other	T
FBgn0050431	0.08225	0.19457	2.36574	Other	T
FBgn0033096	0.0813	0.16598	2.04148	Other	T
FBgn0041145	0.07388	0.14497	1.96222	Other	T
FBgn0013732	0.08144	0.1691	2.07641	Other	T
FBgn0026761	0.04016	0.09449	2.35271	Other	T
FBgn0033050	0.07413	0.17548	2.3672	Other	T
FBgn0033081	0.06045	0.12144	2.00889	Other	T
FBgn0042083	0.03565	0.06927	1.94317	Other	T
FBgn0000054	0.00364	0.00506	1.39043	Other	T
FBgn0004145	0.01913	0.00593	0.30983	Other	T
FBgn0010347	0.35887	0.34762	0.96866	Other	T
FBgn0014009	0.0001	0.00012	1.21232	Other	T
FBgn0021847	0.01666	0.03647	2.18866	Other	T
FBgn0029131	0.04298	0.06821	1.5872	Other	T
FBgn0033054	0.06608	0.12163	1.84076	Other	T
FBgn0033055	0.05326	0.10853	2.03782	Other	T
FBgn0033056	0.21718	0.43624	2.00868	Other	T
FBgn0033059	0.11508	0.24213	2.10406	Other	T
FBgn0033067	0.20874	0.38362	1.83778	Other	T
FBgn0033069	0.15004	0.28758	1.91663	Other	T
FBgn0033079	0.03996	0.07917	1.98095	Other	T
FBgn0033085	0.06417	0.15534	2.42063	Other	T
FBgn0033088	0.04156	0.09127	2.1963	Other	T
FBgn0033089	0.00184	0.0137	7.4297	Other	T
FBgn0033092	0.15682	0.17541	1.11854	Other	T
FBgn0033094	0.00511	0.00739	1.44646	Other	T
FBgn0033095	0.03455	0.05749	1.6638	Other	T
FBgn0033100	0.03352	0.0587	1.75144	Other	T
FBgn0040502	0.06861	0.19941	2.90653	Other	T
FBgn0050443	0.14277	0.29499	2.06627	Other	T
FBgn0050445	0.01664	0.0282	1.69404	Other	T
FBgn0050446	0.0153	0.02137	1.39686	Other	T
FBgn0037256	0.05017	0.07724	1.53955	Other	T
FBgn0052944	0.07639	0.13491	1.76613	Other	T
FBgn0037275	0.08344	0.16589	1.98822	Other	T
FBgn0037254	0.0299	0.09522	3.18424	Other	T
FBgn0037261	0.23188	0.22336	0.96325	Other	T
FBgn0052945	0.21413	0.41495	1.9378	Other	T
FBgn0037245	0.12019	0.13988	1.16379	Other	T
FBgn0004913	0.09079	0.1786	1.96731	Other	T
FBgn0037289	0.03693	0.05625	1.52302	Other	T
FBgn0037242	0.05181	0.08195	1.58174	Other	T
FBgn0037277	0.04655	0.07893	1.69543	Other	T
FBgn0027570	0.02963	0.06512	2.19745	Other	T
FBgn0037282	0.33685	0.387	1.14888	Other	T
FBgn0037248	0.2002	0.29453	1.47116	Other	T
FBgn0051525	0.59219	0.72349	1.22172	Other	T
FBgn0037257	0.1295	0.22936	1.77109	Other	T
FBgn0037280	0.05735	0.10845	1.89098	Other	T
FBgn0037250	0.09023	0.18258	2.0235	Other	T
FBgn0003002	0.02234	0.04808	2.1521	Other	T
FBgn0004436	0.0001	4e-05	0.3832	Other	T
FBgn0010750	0.04142	0.08956	2.16203	Other	T
FBgn0011341	0.03758	0.06474	1.72287	Other	T
FBgn0013743	0.20747	0.24897	1.20002	Other	T
FBgn0020280	0.39183	0.60253	1.53771	Other	T
FBgn0026417	0.06726	0.13886	2.06449	Other	T
FBgn0026620	0.23457	0.33563	1.43079	Other	T
FBgn0037241	0.05394	0.09975	1.8493	Other	T
FBgn0037243	0.05797	0.1079	1.86136	Other	T
FBgn0037244	0.03164	0.08093	2.5579	Other	T
FBgn0037249	0.02925	0.05115	1.74883	Other	T
FBgn0037252	0.14246	0.21341	1.49798	Other	T
FBgn0037255	0.05129	0.10484	2.044	Other	T
FBgn0037262	0.05716	0.11593	2.02829	Other	T
FBgn0037265	0.1288	0.20069	1.55812	Other	T
FBgn0037270	0.00462	0.01232	2.6674	Other	T
FBgn0037276	0.0305	0.1331	4.36344	Other	T
FBgn0037278	0.27583	0.34641	1.2559	Other	T
FBgn0037279	0.0201	0.03399	1.69083	Other	T
FBgn0037290	0.04196	0.07694	1.83381	Other	T
FBgn0037291	0.22556	0.45882	2.03414	Other	T
FBgn0051523	0.04173	0.06436	1.54201	Other	T
FBgn0051528	0.16799	0.31253	1.86045	Other	T
FBgn0051530	0.03598	0.06533	1.81593	Other	T
FBgn0044324	0.06415	0.13081	2.03924	Other	T
FBgn0053291	0.03068	0.05007	1.63191	Other	T
FBgn0053288	0.10932	0.16006	1.46406	Other	T
FBgn0027086	0.04661	0.08794	1.88668	Other	T
FBgn0029152	0.09262	0.14145	1.52734	Other	T
FBgn0037188	0.07512	0.13172	1.75346	Other	T
FBgn0027339	0.02818	0.06584	2.33639	Other	T
FBgn0037078	0.20543	0.23894	1.16316	Other	T
FBgn0037150	0.56436	0.89432	1.58466	Other	T
FBgn0037141	0.09689	0.1931	1.99306	Other	T
FBgn0026371	0.07496	0.12052	1.60787	Other	T
FBgn0037093	0.07391	0.11816	1.59865	Other	T
FBgn0037135	0.06203	0.10067	1.62297	Other	T
FBgn0027532	0.14989	0.27659	1.84527	Other	T
FBgn0037174	0.04281	0.08388	1.9591	Other	T
FBgn0037169	0.50964	0.85974	1.68698	Other	T
FBgn0037142	0.04814	0.09784	2.03256	Other	T
FBgn0000100	0.01012	0.01047	1.03444	Other	T
FBgn0000258	0.0001	0.00016	1.57958	Other	T
FBgn0003042	0.05601	0.12517	2.23476	Other	T
FBgn0004179	0.03018	0.03616	1.19795	Other	T
FBgn0004514	0.03738	0.06551	1.75272	Other	T
FBgn0010215	0.0046	0.01112	2.41877	Other	T
FBgn0010348	0.0001	6e-05	0.58278	Other	T
FBgn0014143	0.02099	0.03219	1.53368	Other	T
FBgn0015075	0.04123	0.0849	2.05899	Other	T
FBgn0024733	0.00844	0.01239	1.46703	Other	T
FBgn0025702	0.0143	0.0278	1.9433	Other	T
FBgn0027542	0.09929	0.21914	2.20705	Other	T
FBgn0033583	0.01344	0.02561	1.90512	Other	T
FBgn0037094	0.00802	0.01838	2.29325	Other	T
FBgn0037122	0.25324	0.28523	1.12629	Other	T
FBgn0037130	0.02541	0.03188	1.25475	Other	T
FBgn0037134	0.08628	0.22669	2.62724	Other	T
FBgn0037137	0.13926	0.21333	1.53185	Other	T
FBgn0037138	0.04463	0.07097	1.59003	Other	T
FBgn0037149	0.09722	0.23317	2.39824	Other	T
FBgn0037163	0.05974	0.15239	2.55116	Other	T
FBgn0037164	0.06778	0.15669	2.31157	Other	T
FBgn0037172	0.2284	0.43399	1.90008	Other	T
FBgn0037175	0.12623	0.31514	2.49663	Other	T
FBgn0037176	0.03262	0.0944	2.89346	Other	T
FBgn0037181	0.07295	0.16937	2.32166	Other	T
FBgn0037182	0.06752	0.13273	1.96576	Other	T
FBgn0037184	0.15983	0.37529	2.34804	Other	T
FBgn0037186	0.03705	0.11231	3.03162	Other	T
FBgn0037191	0.11155	0.27814	2.49332	Other	T
FBgn0037195	0.35642	0.53557	1.50264	Other	T
FBgn0037199	0.02957	0.06573	2.22293	Other	T
FBgn0037200	0.14465	0.31974	2.21047	Other	T
FBgn0037202	0.02471	0.08217	3.32468	Other	T
FBgn0037204	0.05833	0.14556	2.49574	Other	T
FBgn0037205	0.31808	0.58373	1.83518	Other	T
FBgn0052230	0.01885	0.02644	1.40237	Other	T
FBgn0052442	0.09549	0.19569	2.04933	Other	T
FBgn0052446	0.1402	0.1492	1.06421	Other	T
FBgn0052447	0.04178	0.04472	1.07046	Other	T
FBgn0052448	0.02952	0.10343	3.50411	Other	T
FBgn0052451	0.01382	0.03479	2.51721	Other	T
FBgn0052459	0.38284	0.6222	1.62521	Other	T
FBgn0052461	0.23718	0.48291	2.03609	Other	T
FBgn0053170	0.1121	0.1968	1.75555	Other	T
FBgn0053214	0.04026	0.08983	2.2316	Other	T
FBgn0053217	0.21383	0.59549	2.78493	Other	T
FBgn0053768	0.10967	0.24693	2.25153	Other	T
FBgn0053769	0.11254	0.21932	1.94874	Other	T
FBgn0037224	0.1165	0.22072	1.89457	Other	T
FBgn0037238	0.06848	0.08865	1.2946	Other	T
FBgn0037232	0.05166	0.10101	1.95524	Other	T
FBgn0010225	0.09038	0.15197	1.68134	Other	T
FBgn0037218	0.10634	0.17045	1.60285	Other	T
FBgn0037225	0.09578	0.14042	1.46598	Other	T
FBgn0037236	0.10405	0.1862	1.78953	Other	T
FBgn0037226	0.0651	0.16556	2.54327	Other	T
FBgn0041621	0.11361	0.24575	2.16303	Other	T
FBgn0015331	0.0255	0.05506	2.15913	Other	T
FBgn0037219	0.10408	0.21555	2.07109	Other	T
FBgn0037230	0.11157	0.25477	2.28354	Other	T
FBgn0001204	0.06743	0.13722	2.03509	Other	T
FBgn0003882	0.18508	0.28876	1.56014	Other	T
FBgn0027866	0.16942	0.28746	1.69674	Other	T
FBgn0037217	0.1682	0.27267	1.62109	Other	T
FBgn0037220	0.01122	0.027	2.406	Other	T
FBgn0037227	0.04897	0.08169	1.66808	Other	T
FBgn0037228	0.06721	0.17959	2.67213	Other	T
FBgn0037229	0.13324	0.15628	1.17293	Other	T
FBgn0037231	0.03677	0.06869	1.8681	Other	T
FBgn0037233	0.03624	0.08933	2.46455	Other	T
FBgn0037234	0.21788	0.30001	1.37692	Other	T
FBgn0037235	0.09118	0.17717	1.94313	Other	T
FBgn0037239	0.05584	0.11188	2.00338	Other	T
FBgn0040687	0.13407	0.22535	1.6808	Other	T
FBgn0041605	0.0155	0.00908	0.58589	Other	T
FBgn0051516	0.15797	0.30683	1.94227	Other	T
FBgn0004054	0.25767	0.39429	1.53022	Other	T
FBgn0004053	0.09124	0.16089	1.76352	Other	T
FBgn0000439	0.0685	0.06894	1.00644	Other	T
FBgn0000071	0.06206	0.11956	1.92656	Other	T
FBgn0000166	0.0668	0.06778	1.0147	Other	T
FBgn0003339	0.04203	0.05926	1.40994	Other	T
FBgn0001077	0.10003	0.11208	1.1205	Other	T
FBgn0000095	0.02055	0.02114	1.02855	Other	T
FBgn0032772	0.09373	0.12072	1.2879	Other	T
FBgn0041789	0.02781	0.03078	1.10664	Other	T
FBgn0032773	0.17037	0.33239	1.95094	Other	T
FBgn0032779	0.06769	0.13387	1.97776	Other	T
FBgn0010309	0.02285	0.04792	2.09735	Other	T
FBgn0032770	0.07415	0.19578	2.64031	Other	T
FBgn0032771	0.01619	0.03433	2.12013	Other	T
FBgn0032774	0.10384	0.12101	1.16539	Other	T
FBgn0032775	0.02996	0.05145	1.71727	Other	T
FBgn0032780	0.18148	0.33239	1.83159	Other	T
FBgn0032781	0.0058	0.01091	1.87953	Other	T
FBgn0032782	0.06578	0.1136	1.72709	Other	T
FBgn0032783	0.03929	0.06551	1.66731	Other	T
FBgn0051798	0.03283	0.12599	3.83724	Other	T
FBgn0003346	0.13503	0.23987	1.77634	Other	T
FBgn0024230	0.03041	0.04051	1.3324	Other	T
FBgn0032763	0.11781	0.26723	2.26827	Other	T
FBgn0037314	0.07224	0.17635	2.44123	Other	T
FBgn0037295	0.12686	0.18314	1.44359	Other	T
FBgn0037294	0.43757	0.72952	1.66719	Other	T
FBgn0037304	0.12312	0.20678	1.67958	Other	T
FBgn0037310	0.14108	0.23519	1.66708	Other	T
FBgn0037315	0.07642	0.11744	1.53683	Other	T
FBgn0037301	0.06416	0.11781	1.8363	Other	T
FBgn0003275	0.01858	0.04838	2.60456	Other	T
FBgn0037293	0.12282	0.23668	1.92708	Other	T
FBgn0037297	0.04382	0.07505	1.71263	Other	T
FBgn0037299	0.08478	0.141	1.66314	Other	T
FBgn0037302	0.0197	0.03179	1.61361	Other	T
FBgn0037303	0.07072	0.1141	1.61334	Other	T
FBgn0037305	0.14982	0.26439	1.76471	Other	T
FBgn0037308	0.03293	0.04723	1.43411	Other	T
FBgn0037312	0.02864	0.09953	3.47543	Other	T
FBgn0037313	0.20042	0.16571	0.82683	Other	T
FBgn0037317	0.19809	0.42434	2.14213	Other	T
FBgn0040208	0.04406	0.07155	1.62402	Other	T
FBgn0041707	0.06093	0.13248	2.17441	Other	T
FBgn0051542	0.09613	0.44758	4.65587	Other	T
FBgn0001324	0.02247	0.05284	2.35153	Other	T
FBgn0002044	0.05726	0.09388	1.63963	Other	T
FBgn0036954	0.12951	0.2976	2.29784	Other	T
FBgn0036951	0.08984	0.23622	2.62931	Other	T
FBgn0032801	0.09229	0.21695	2.3509	Other	T
FBgn0053116	0.05049	0.08567	1.69685	Other	T
FBgn0003732	0.04111	0.08781	2.13608	Other	T
FBgn0040786	0.13633	0.34513	2.53152	Other	T
FBgn0036948	0.40154	0.6955	1.73208	Other	T
FBgn0040268	0.08654	0.18772	2.16912	Other	T
FBgn0036949	0.21563	0.37963	1.76055	Other	T
FBgn0032787	0.14696	0.26397	1.79621	Other	T
FBgn0036959	0.13043	0.24399	1.87075	Other	T
FBgn0032800	0.03061	0.06292	2.0555	Other	T
FBgn0036956	0.11254	0.24251	2.15483	Other	T
FBgn0032798	0.03224	0.05224	1.62041	Other	T
FBgn0003744	0.00874	0.01208	1.38252	Other	T
FBgn0005633	0.07237	0.04685	0.64738	Other	T
FBgn0013799	0.02979	0.04329	1.45321	Other	T
FBgn0015796	0.0001	5e-05	0.53113	Other	T
FBgn0020389	0.01524	0.02655	1.74135	Other	T
FBgn0023094	0.01424	0.03318	2.33022	Other	T
FBgn0024814	0.02981	0.06143	2.06047	Other	T
FBgn0024889	0.06378	0.10585	1.65957	Other	T
FBgn0028695	0.01345	0.02454	1.82414	Other	T
FBgn0032785	0.04549	0.06588	1.44824	Other	T
FBgn0032788	0.19407	0.43266	2.2294	Other	T
FBgn0032789	0.2406	0.48861	2.03084	Other	T
FBgn0032790	0.12782	0.22624	1.77004	Other	T
FBgn0032791	0.1718	0.31228	1.8177	Other	T
FBgn0032793	0.14671	0.29055	1.98036	Other	T
FBgn0032797	0.03289	0.0582	1.7694	Other	T
FBgn0032799	0.03318	0.05977	1.80156	Other	T
FBgn0032803	0.10635	0.20306	1.90937	Other	T
FBgn0032804	0.17779	0.29427	1.65514	Other	T
FBgn0036908	0.2346	0.40411	1.72255	Other	T
FBgn0036909	0.04676	0.0922	1.97177	Other	T
FBgn0036911	0.00779	0.01759	2.25811	Other	T
FBgn0036913	0.03529	0.06026	1.70777	Other	T
FBgn0036915	0.02577	0.04942	1.91751	Other	T
FBgn0036918	0.03962	0.07375	1.86129	Other	T
FBgn0036920	0.02686	0.05799	2.15928	Other	T
FBgn0036921	0.03979	0.03472	0.87255	Other	T
FBgn0036924	0.27153	0.41718	1.5364	Other	T
FBgn0036925	0.3426	0.54512	1.59114	Other	T
FBgn0036927	0.0349	0.058	1.66203	Other	T
FBgn0036934	0.03543	0.06344	1.79076	Other	T
FBgn0036936	0.07931	0.14497	1.82787	Other	T
FBgn0036942	0.11252	0.23517	2.08992	Other	T
FBgn0036947	0.16667	0.22319	1.33907	Other	T
FBgn0036953	0.1423	0.31319	2.20084	Other	T
FBgn0036955	0.04984	0.10209	2.04822	Other	T
FBgn0036958	0.04316	0.06219	1.4407	Other	T
FBgn0036967	0.04167	0.03791	0.90966	Other	T
FBgn0052220	0.06875	0.17443	2.53741	Other	T
FBgn0052225	0.04964	0.07426	1.49593	Other	T
FBgn0052228	0.36354	0.77341	2.12743	Other	T
FBgn0033047	0.08256	0.19674	2.38292	Other	T
FBgn0033041	0.07323	0.1342	1.83265	Other	T
FBgn0022288	0.05669	0.16152	2.84902	Other	T
FBgn0033039	0.12801	0.27349	2.13639	Other	T
FBgn0033038	0.05053	0.12684	2.51011	Other	T
FBgn0000099	0.02304	0.0248	1.07641	Other	T
FBgn0025458	0.14341	0.27329	1.90559	Other	T
FBgn0025693	0.20511	0.36933	1.80066	Other	T
FBgn0033043	0.02171	0.05503	2.53464	Other	T
FBgn0040847	0.08067	0.06336	0.78542	Other	T
FBgn0036977	0.07493	0.12521	1.67097	Other	T
FBgn0036978	0.11481	0.21052	1.83367	Other	T
FBgn0011712	0.01095	0.01425	1.30186	Other	T
FBgn0024887	0.02664	0.05303	1.99096	Other	T
FBgn0036974	0.00915	0.00603	0.65855	Other	T
FBgn0050438	0.08767	0.15137	1.72655	Other	T
FBgn0033029	0.10535	0.14258	1.35339	Other	T
FBgn0033028	0.06058	0.11169	1.84368	Other	T
FBgn0033021	0.14414	0.28796	1.99782	Other	T
FBgn0033019	0.10348	0.31338	3.02846	Other	T
FBgn0033027	0.01893	0.04426	2.33802	Other	T
FBgn0033033	0.07649	0.17638	2.30593	Other	T
FBgn0027507	0.1537	0.33666	2.19037	Other	T
FBgn0033017	0.01842	0.04504	2.44514	Other	T
FBgn0033020	0.15407	0.264	1.71348	Other	T
FBgn0033031	0.11129	0.21403	1.92312	Other	T
FBgn0033032	0.07334	0.17295	2.35814	Other	T
FBgn0039969	0.03919	0.09092	2.32007	Other	T
FBgn0050441	0.13786	0.5362	3.8894	Other	T
FBgn0003124	0.01104	0.02029	1.83679	Other	T
FBgn0002774	0.08222	0.1519	1.84747	Other	T
FBgn0010774	0.07983	0.10715	1.34226	Other	T
FBgn0037467	0.04492	0.09403	2.09309	Other	T
FBgn0026563	0.34968	0.72557	2.07497	Other	T
FBgn0037465	0.02818	0.05411	1.92015	Other	T
FBgn0037469	0.03367	0.07937	2.35687	Other	T
FBgn0037470	0.17003	0.26629	1.56615	Other	T
FBgn0002306	0.11473	0.13197	1.15019	Other	T
FBgn0011020	0.0721	0.16043	2.22525	Other	T
FBgn0037482	0.08308	0.13776	1.65826	Other	T
FBgn0037472	0.07941	0.12288	1.5474	Other	T
FBgn0037481	0.18777	0.30491	1.62382	Other	T
FBgn0014863	0.00915	0.01093	1.19451	Other	T
FBgn0037473	0.03789	0.06129	1.61745	Other	T
FBgn0037475	0.01439	0.02432	1.69046	Other	T
FBgn0037478	0.03014	0.06931	2.29976	Other	T
FBgn0051248	0.08397	0.16255	1.93577	Other	T
FBgn0003231	0.18926	0.29723	1.57049	Other	T
FBgn0026210	0.02254	0.01503	0.66684	Other	T
FBgn0027092	0.02465	0.04335	1.75865	Other	T
FBgn0032760	0.04038	0.11723	2.90293	Other	T
FBgn0032761	0.04541	0.09168	2.019	Other	T
FBgn0032762	0.02555	0.05086	1.99088	Other	T
FBgn0032805	0.0882	0.15408	1.74683	Other	T
FBgn0002031	0.00691	0.00788	1.14002	Other	T
FBgn0032809	0.0456	0.09016	1.97718	Other	T
FBgn0032810	0.07202	0.11389	1.58139	Other	T
FBgn0037488	0.11937	0.1981	1.65953	Other	T
FBgn0011282	0.1576	0.2322	1.47342	Other	T
FBgn0037483	0.01289	0.0425	3.29697	Other	T
FBgn0037485	0.07327	0.12462	1.70069	Other	T
FBgn0037489	0.03932	0.09569	2.43342	Other	T
FBgn0037492	0.04816	0.0821	1.70458	Other	T
FBgn0045843	0.05848	0.12972	2.21805	Other	T
FBgn0037320	0.39995	0.54128	1.35337	Other	T
FBgn0037326	0.08114	0.03162	0.38967	Other	T
FBgn0037327	0.07298	0.13912	1.90641	Other	T
FBgn0011715	0.00096	0.00231	2.39859	Other	T
FBgn0025825	0.00795	0.02046	2.57184	Other	T
FBgn0037321	0.01633	0.02581	1.58008	Other	T
FBgn0037323	0.00551	0.01128	2.04787	Other	T
FBgn0037328	0.04715	0.03792	0.80437	Other	T
FBgn0037329	0.04731	0.10901	2.30395	Other	T
FBgn0037330	0.10569	0.2108	1.99458	Other	T
FBgn0000422	0.03685	0.04663	1.26559	Other	T
FBgn0002036	0.08691	0.17208	1.97983	Other	T
FBgn0001259	0.0607	0.12053	1.98565	Other	T
FBgn0000075	0.04824	0.07775	1.61172	Other	T
FBgn0002023	0.02562	0.0321	1.25275	Other	T
FBgn0037008	0.10193	0.17347	1.70178	Other	T
FBgn0037010	0.04211	0.05377	1.27696	Other	T
FBgn0053969	0.12405	0.25182	2.03003	Other	T
FBgn0036995	0.03835	0.06807	1.77503	Other	T
FBgn0036991	0.15635	0.30532	1.95273	Other	T
FBgn0036996	0.07119	0.12823	1.80124	Other	T
FBgn0052428	0.20501	0.20526	1.00123	Other	T
FBgn0001247	0.03231	0.0566	1.75167	Other	T
FBgn0001320	0.06485	0.09735	1.50128	Other	T
FBgn0027565	0.15738	0.24128	1.53313	Other	T
FBgn0028978	0.06229	0.08247	1.324	Other	T
FBgn0036979	0.10601	0.26767	2.52487	Other	T
FBgn0036980	0.02019	0.02624	1.29994	Other	T
FBgn0036986	0.00903	0.01416	1.56865	Other	T
FBgn0036990	0.01301	0.02801	2.15301	Other	T
FBgn0036992	0.02197	0.02871	1.30658	Other	T
FBgn0036999	0.07606	0.1172	1.54082	Other	T
FBgn0032753	0.05064	0.06442	1.27219	Other	T
FBgn0032986	0.12886	0.22952	1.78111	Other	T
FBgn0003866	0.05262	0.09026	1.71539	Other	T
FBgn0032966	0.39558	0.5255	1.32842	Other	T
FBgn0032973	0.10694	0.18993	1.77597	Other	T
FBgn0032750	0.07483	0.13125	1.75396	Other	T
FBgn0032752	0.10571	0.25957	2.45545	Other	T
FBgn0032971	0.10307	0.19813	1.92231	Other	T
FBgn0051600	0.43317	0.75294	1.7382	Other	T
FBgn0025674	0.0747	0.14665	1.96325	Other	T
FBgn0032748	0.07562	0.11581	1.53157	Other	T
FBgn0032988	0.09217	0.22034	2.39044	Other	T
FBgn0028979	0.13955	0.1858	1.33139	Other	T
FBgn0032749	0.06351	0.1164	1.83281	Other	T
FBgn0032751	0.07916	0.15585	1.96878	Other	T
FBgn0032968	0.25241	0.4714	1.86762	Other	T
FBgn0032972	0.04424	0.13994	3.16291	Other	T
FBgn0032974	0.24388	0.3697	1.51588	Other	T
FBgn0032979	0.01875	0.04095	2.18389	Other	T
FBgn0032987	0.0019	0.00565	2.98096	Other	T
FBgn0040519	0.26605	0.40727	1.53078	Other	T
FBgn0000486	0.00806	0.01713	2.12411	Other	T
FBgn0005672	0.05628	0.08699	1.54564	Other	T
FBgn0014127	0.09947	0.21403	2.15159	Other	T
FBgn0032824	0.34542	0.58891	1.70491	Other	T
FBgn0032821	0.03621	0.06347	1.75305	Other	T
FBgn0032838	0.03232	0.05653	1.74888	Other	T
FBgn0032812	0.13071	0.1752	1.34039	Other	T
FBgn0032840	0.09165	0.14375	1.5684	Other	T
FBgn0032819	0.06426	0.13609	2.11794	Other	T
FBgn0032825	0.04462	0.10472	2.34668	Other	T
FBgn0005590	0.06736	0.11796	1.75125	Other	T
FBgn0000464	0.01442	0.0182	1.26237	Other	T
FBgn0000529	0.11498	0.1418	1.23322	Other	T
FBgn0014000	0.16861	0.35997	2.13497	Other	T
FBgn0019686	0.018	0.03264	1.8134	Other	T
FBgn0027949	0.10888	0.2161	1.98477	Other	T
FBgn0032813	0.0751	0.17117	2.27921	Other	T
FBgn0032815	0.28126	0.45423	1.61496	Other	T
FBgn0032816	0.02238	0.04719	2.10864	Other	T
FBgn0032818	0.05382	0.09783	1.81756	Other	T
FBgn0032820	0.02794	0.04736	1.69493	Other	T
FBgn0032822	0.01928	0.05447	2.82478	Other	T
FBgn0032827	0.14322	0.38263	2.67168	Other	T
FBgn0032833	0.03826	0.05192	1.35688	Other	T
FBgn0032835	0.15402	0.33725	2.18967	Other	T
FBgn0032836	0.25931	0.51065	1.96925	Other	T
FBgn0045064	0.0129	0.01538	1.19224	Other	T
FBgn0032744	0.07704	0.1375	1.78477	Other	T
FBgn0032850	0.04261	0.07408	1.7387	Other	T
FBgn0032948	0.211	0.19916	0.94388	Other	T
FBgn0032846	0.1342	0.23767	1.77101	Other	T
FBgn0032845	0.07691	0.17376	2.25931	Other	T
FBgn0032853	0.1693	0.39747	2.34776	Other	T
FBgn0032848	0.07561	0.16619	2.19804	Other	T
FBgn0032849	0.07702	0.15426	2.00269	Other	T
FBgn0020303	0.02812	0.07035	2.50203	Other	T
FBgn0032745	0.14242	0.18607	1.3065	Other	T
FBgn0032746	0.00322	0.00727	2.25556	Other	T
FBgn0032847	0.02036	0.04894	2.40396	Other	T
FBgn0032947	0.11828	0.21037	1.7785	Other	T
FBgn0040996	0.15966	0.36945	2.31405	Other	T
FBgn0002022	0.06325	0.11256	1.77968	Other	T
FBgn0051146	0.08386	0.09761	1.16404	Other	T
FBgn0037515	0.1134	0.21323	1.88028	Other	T
FBgn0037521	0.07599	0.08126	1.06931	Other	T
FBgn0042102	0.09744	0.14871	1.52614	Other	T
FBgn0037506	0.08672	0.157	1.81045	Other	T
FBgn0015575	0.0633	0.10982	1.73501	Other	T
FBgn0037509	0.15465	0.18435	1.19201	Other	T
FBgn0037517	0.05257	0.09154	1.74133	Other	T
FBgn0015569	0.05296	0.10432	1.96979	Other	T
FBgn0037501	0.11383	0.21615	1.89898	Other	T
FBgn0015571	0.05738	0.15314	2.6688	Other	T
FBgn0017456	0.02191	0.05159	2.35505	Other	T
FBgn0037502	0.10149	0.22726	2.23924	Other	T
FBgn0037518	0.092	0.21788	2.36836	Other	T
FBgn0037520	0.27194	0.54031	1.98689	Other	T
FBgn0042103	0.1449	0.24145	1.66634	Other	T
FBgn0042104	0.0563	0.09865	1.75216	Other	T
FBgn0051473	0.11629	0.23695	2.03753	Other	T
FBgn0032742	0.03389	0.05467	1.61297	Other	T
FBgn0051800	0.06258	0.09493	1.51698	Other	T
FBgn0037022	0.07099	0.12382	1.7443	Other	T
FBgn0037023	0.08738	0.20165	2.30779	Other	T
FBgn0037021	0.03201	0.05167	1.61404	Other	T
FBgn0037031	0.0725	0.13949	1.9239	Other	T
FBgn0037028	0.08346	0.15709	1.8823	Other	T
FBgn0000275	0.0134	0.01207	0.90098	Other	T
FBgn0027055	0.04157	0.05083	1.22291	Other	T
FBgn0037016	0.20713	0.3036	1.46576	Other	T
FBgn0037019	0.06478	0.10584	1.63374	Other	T
FBgn0037020	0.06452	0.10368	1.60696	Other	T
FBgn0037027	0.16082	0.27273	1.69591	Other	T
FBgn0037029	0.07694	0.07805	1.01432	Other	T
FBgn0037030	0.06072	0.17073	2.81183	Other	T
FBgn0037035	0.04514	0.12095	2.67935	Other	T
FBgn0040636	0.27408	0.1011	0.36886	Other	T
FBgn0052432	0.01896	0.02411	1.27188	Other	T
FBgn0001202	0.02364	0.05702	2.41238	Other	T
FBgn0015772	0.0802	0.10325	1.28741	Other	T
FBgn0032723	0.08605	0.14209	1.65133	Other	T
FBgn0032725	0.0323	0.0382	1.18256	Other	T
FBgn0032741	0.0486	0.0664	1.36626	Other	T
FBgn0032729	0.04525	0.07579	1.67492	Other	T
FBgn0015745	0.02785	0.03004	1.0787	Other	T
FBgn0032726	0.03757	0.05965	1.58749	Other	T
FBgn0032727	0.15443	0.21522	1.39366	Other	T
FBgn0032728	0.11918	0.23558	1.9767	Other	T
FBgn0032730	0.08549	0.15849	1.85383	Other	T
FBgn0032731	0.0199	0.04056	2.03797	Other	T
FBgn0032732	0.02996	0.03871	1.29195	Other	T
FBgn0032733	0.13804	0.20437	1.48051	Other	T
FBgn0032734	0.33477	0.69475	2.07533	Other	T
FBgn0000239	0.02332	0.02866	1.22885	Other	T
FBgn0032706	0.05462	0.09532	1.74511	Other	T
FBgn0003896	0.03001	0.01893	0.6306	Other	T
FBgn0053120	0.05159	0.09551	1.85117	Other	T
FBgn0025608	0.04626	0.07275	1.57262	Other	T
FBgn0027074	0.12191	0.1906	1.56341	Other	T
FBgn0032717	0.13111	0.2091	1.59479	Other	T
FBgn0032705	0.0883	0.18455	2.09001	Other	T
FBgn0032707	0.06913	0.11796	1.7064	Other	T
FBgn0032709	0.18968	0.37584	1.98141	Other	T
FBgn0032719	0.04949	0.01403	0.28345	Other	T
FBgn0032720	0.01367	0.01933	1.41388	Other	T
FBgn0032721	0.04753	0.06667	1.40259	Other	T
FBgn0040992	0.07031	0.14769	2.10065	Other	T
FBgn0040993	0.09459	0.09454	0.99949	Other	T
FBgn0045852	0.14612	0.19121	1.30854	Other	T
FBgn0004865	0.12154	0.10756	0.88494	Other	T
FBgn0003415	0.0642	0.09332	1.45348	Other	T
FBgn0037065	0.15002	0.19024	1.26806	Other	T
FBgn0000551	0.04245	0.07428	1.74968	Other	T
FBgn0028402	0.04639	0.0937	2.01976	Other	T
FBgn0037061	0.04001	0.07696	1.92356	Other	T
FBgn0037070	0.02217	0.04232	1.90937	Other	T
FBgn0041100	0.01715	0.03692	2.15318	Other	T
FBgn0053056	0.04872	0.07162	1.46997	Other	T
FBgn0015553	0.10237	0.19305	1.88572	Other	T
FBgn0032692	0.11146	0.15951	1.43112	Other	T
FBgn0032693	0.0987	0.18803	1.90505	Other	T
FBgn0032702	0.12149	0.19452	1.60115	Other	T
FBgn0005617	0.23031	0.42172	1.83109	Other	T
FBgn0032694	0.02442	0.03833	1.56962	Other	T
FBgn0032698	0.07688	0.16764	2.18047	Other	T
FBgn0032699	0.04031	0.07268	1.80333	Other	T
FBgn0032700	0.02153	0.03998	1.85715	Other	T
FBgn0032701	0.15637	0.24752	1.58295	Other	T
FBgn0032703	0.05033	0.12112	2.40656	Other	T
FBgn0032704	0.04939	0.07573	1.5332	Other	T
FBgn0051751	0.06287	0.111	1.76569	Other	T
FBgn0051790	0.03692	0.06437	1.74352	Other	T
FBgn0003475	0.05293	0.05684	1.07386	Other	T
FBgn0032910	0.13214	0.085	0.64328	Other	T
FBgn0040297	0.08358	0.08043	0.96222	Other	T
FBgn0032925	0.08801	0.15583	1.77052	Other	T
FBgn0032919	0.05692	0.11729	2.06064	Other	T
FBgn0032858	0.06365	0.15757	2.4754	Other	T
FBgn0032923	0.11734	0.21251	1.81102	Other	T
FBgn0016054	0.05553	0.09976	1.79665	Other	T
FBgn0051688	0.21093	0.14359	0.68076	Other	T
FBgn0032878	0.1276	0.24591	1.92724	Other	T
FBgn0032900	0.27899	0.33013	1.18332	Other	T
FBgn0032856	0.13759	0.14844	1.07885	Other	T
FBgn0014859	0.06284	0.09029	1.43686	Other	T
FBgn0032916	0.07884	0.16085	2.04022	Other	T
FBgn0032924	0.09566	0.21478	2.24519	Other	T
FBgn0032904	0.12122	0.19364	1.5974	Other	T
FBgn0051678	0.10769	0.18616	1.72877	Other	T
FBgn0032867	0.47814	0.71002	1.48494	Other	T
FBgn0032879	0.03464	0.0509	1.46946	Other	T
FBgn0032891	0.06403	0.11054	1.72625	Other	T
FBgn0051673	0.0689	0.10349	1.50201	Other	T
FBgn0042133	0.23804	0.45639	1.91727	Other	T
FBgn0032920	0.45844	0.7579	1.65322	Other	T
FBgn0032883	0.07467	0.17445	2.33636	Other	T
FBgn0032915	0.11655	0.20424	1.75238	Other	T
FBgn0032864	0.077	0.14603	1.89643	Other	T
FBgn0032873	0.03965	0.07731	1.94991	Other	T
FBgn0032872	0.04609	0.06923	1.50215	Other	T
FBgn0000251	0.03561	0.05824	1.63555	Other	T
FBgn0000986	0.03384	0.06245	1.84563	Other	T
FBgn0011202	0.03686	0.0628	1.7039	Other	T
FBgn0011638	0.05115	0.1178	2.30291	Other	T
FBgn0015803	0.03419	0.03811	1.11471	Other	T
FBgn0024371	0.06639	0.10351	1.55921	Other	T
FBgn0028633	0.01458	0.02517	1.72682	Other	T
FBgn0032857	0.0397	0.0963	2.42592	Other	T
FBgn0032859	0.01295	0.01159	0.89496	Other	T
FBgn0032869	0.10449	0.24968	2.38956	Other	T
FBgn0032870	0.04122	0.10035	2.43468	Other	T
FBgn0032871	0.12997	0.24844	1.91159	Other	T
FBgn0032877	0.31218	0.52615	1.6854	Other	T
FBgn0032880	0.02275	0.04669	2.052	Other	T
FBgn0032881	0.13848	0.21466	1.55015	Other	T
FBgn0032882	0.03228	0.06494	2.01203	Other	T
FBgn0032884	0.06998	0.10231	1.46191	Other	T
FBgn0032885	0.02011	0.02967	1.4749	Other	T
FBgn0032886	0.02613	0.03325	1.27267	Other	T
FBgn0032889	0.03989	0.06056	1.51816	Other	T
FBgn0032894	0.12942	0.34511	2.66651	Other	T
FBgn0032895	0.0576	0.15282	2.65301	Other	T
FBgn0032896	0.16842	0.39165	2.32539	Other	T
FBgn0032901	0.00946	0.00582	0.61547	Other	T
FBgn0032906	0.04039	0.06833	1.69172	Other	T
FBgn0032907	0.16388	0.3064	1.86968	Other	T
FBgn0032911	0.04453	0.06825	1.53266	Other	T
FBgn0032913	0.0887	0.16734	1.88661	Other	T
FBgn0032921	0.07878	0.17777	2.25651	Other	T
FBgn0032922	0.10127	0.15888	1.56884	Other	T
FBgn0032926	0.11978	0.20964	1.75031	Other	T
FBgn0051627	0.19813	0.42907	2.1656	Other	T
FBgn0051674	0.07867	0.16012	2.03518	Other	T
FBgn0051676	0.08659	0.1389	1.60413	Other	T
FBgn0053322	0.09252	0.35039	3.7871	Other	T
FBgn0053511	0.13008	0.2881	2.21485	Other	T
FBgn0054007	0.17513	0.23954	1.36782	Other	T
FBgn0032691	0.12351	0.20581	1.66629	Other	T
FBgn0032690	0.02896	0.05678	1.96087	Other	T
FBgn0032689	0.03473	0.0623	1.79379	Other	T
FBgn0003270	0.04519	0.1245	2.75487	Other	T
FBgn0032688	0.0517	0.09123	1.76455	Other	T
FBgn0037526	0.11752	0.20593	1.75229	Other	T
FBgn0033103	0.08854	0.07929	0.89547	Other	T
FBgn0037529	0.04891	0.06986	1.4283	Other	T
FBgn0051284	0.00901	0.01538	1.70664	Other	T
FBgn0022774	0.0374	0.06333	1.69338	Other	T
FBgn0037530	0.07037	0.10744	1.5269	Other	T
FBgn0024909	0.03908	0.10487	2.68388	Other	T
FBgn0036897	0.10397	0.1311	1.26097	Other	T
FBgn0014930	0.10128	0.14577	1.43929	Other	T
FBgn0014028	0.00823	0.02772	3.36613	Other	T
FBgn0033104	0.00485	0.01427	2.93956	Other	T
FBgn0022224	0.00399	0.00574	1.4397	Other	T
FBgn0037531	0.18633	0.36575	1.96295	Other	T
FBgn0028954	0.09437	0.14219	1.50676	Other	T
FBgn0002542	0.1019	0.20426	2.00456	Other	T
FBgn0033107	0.10036	0.15735	1.56788	Other	T
FBgn0029094	0.0185	0.05672	3.06597	Other	T
FBgn0036894	0.04424	0.0756	1.70884	Other	T
FBgn0036893	0.01634	0.03098	1.89637	Other	T
FBgn0036892	0.05515	0.09502	1.7228	Other	T
FBgn0036891	0.06931	0.11984	1.72897	Other	T
FBgn0033108	0.2738	0.23191	0.847	Other	T
FBgn0010417	0.02015	0.04178	2.07328	Other	T
FBgn0005386	0.05722	0.11259	1.96774	Other	T
FBgn0036889	0.10587	0.17054	1.61078	Other	T
FBgn0037533	0.14686	0.21604	1.47102	Other	T
FBgn0010401	0.13438	0.20808	1.54848	Other	T
FBgn0037536	0.02499	0.05263	2.10634	Other	T
FBgn0037537	0.04905	0.081	1.65153	Other	T
FBgn0037538	0.04985	0.10346	2.07552	Other	T
FBgn0037539	0.1397	0.18815	1.34679	Other	T
FBgn0037540	0.13803	0.29399	2.12987	Other	T
FBgn0033110	0.15199	0.3185	2.09557	Other	T
FBgn0036886	0.09775	0.1746	1.78616	Other	T
FBgn0037541	0.02442	0.04278	1.75177	Other	T
FBgn0052210	0.07556	0.12885	1.70535	Other	T
FBgn0033112	0.20986	0.49964	2.3808	Other	T
FBgn0001255	0.108	0.14757	1.36636	Other	T
FBgn0037543	0.00814	0.01448	1.77924	Other	T
FBgn0036884	0.05612	0.12455	2.21947	Other	T
FBgn0037544	0.06752	0.16374	2.42491	Other	T
FBgn0010812	0.03675	0.07805	2.12374	Other	T
FBgn0036882	0.06844	0.12369	1.80735	Other	T
FBgn0036880	0.03791	0.08117	2.14088	Other	T
FBgn0050158	0.01403	0.01622	1.15595	Other	T
FBgn0037546	0.04586	0.0741	1.61599	Other	T
FBgn0032682	0.11235	0.19978	1.7782	Other	T
FBgn0032681	0.09359	0.10261	1.09634	Other	T
FBgn0037547	0.06734	0.12422	1.84471	Other	T
FBgn0033117	0.07301	0.14602	1.99997	Other	T
FBgn0037548	0.13465	0.23213	1.72398	Other	T
FBgn0004210	0.12198	0.10703	0.87745	Other	T
FBgn0037550	0.01241	0.02322	1.87099	Other	T
FBgn0037551	0.00279	0.00235	0.84274	Other	T
FBgn0032679	0.05186	0.09644	1.85959	Other	T
FBgn0032678	0.09858	0.20259	2.05515	Other	T
FBgn0004413	0.00816	0.01018	1.24721	Other	T
FBgn0001138	0.02237	0.01664	0.74382	Other	T
FBgn0033121	0.11437	0.21983	1.92218	Other	T
FBgn0050157	0.14291	0.28847	2.0185	Other	T
FBgn0022960	0.02332	0.04192	1.79818	Other	T
FBgn0050156	0.14985	0.27608	1.84238	Other	T
FBgn0033122	0.0541	0.08669	1.6024	Other	T
FBgn0050159	0.04577	0.11044	2.41286	Other	T
FBgn0029508	0.11442	0.13898	1.21463	Other	T
FBgn0037553	0.18101	0.33898	1.87272	Other	T
FBgn0033124	0.08869	0.18362	2.0704	Other	T
FBgn0037554	0.04687	0.07836	1.67177	Other	T
FBgn0037555	0.02178	0.03923	1.80128	Other	T
FBgn0029507	0.07329	0.13412	1.83002	Other	T
FBgn0037556	0.01759	0.03967	2.25517	Other	T
FBgn0064126	0.06599	0.14153	2.14471	Other	T
FBgn0037559	0.03743	0.07029	1.87773	Other	T
FBgn0037560	0.543	0.8248	1.51897	Other	T
FBgn0010173	0.02983	0.06933	2.32386	Other	T
FBgn0033127	0.13705	0.20479	1.49427	Other	T
FBgn0014861	0.00668	0.01169	1.7517	Other	T
FBgn0037561	0.02991	0.07595	2.53918	Other	T
FBgn0033128	0.09073	0.16025	1.76623	Other	T
FBgn0033129	0.12083	0.19145	1.58446	Other	T
FBgn0010433	0.06057	0.09159	1.51217	Other	T
FBgn0033130	0.06175	0.09499	1.53837	Other	T
FBgn0033132	0.05561	0.11429	2.05506	Other	T
FBgn0037562	0.32336	0.51911	1.60536	Other	T
FBgn0037563	0.15684	0.26091	1.66357	Other	T
FBgn0051464	0.14337	0.29108	2.0303	Other	T
FBgn0033133	0.08799	0.17635	2.00411	Other	T
FBgn0051463	0.1085	0.18698	1.72337	Other	T
FBgn0037565	0.07659	0.12569	1.64113	Other	T
FBgn0033134	0.13112	0.19709	1.5031	Other	T
FBgn0037566	0.04038	0.07522	1.86288	Other	T
FBgn0016032	0.07984	0.1297	1.62441	Other	T
FBgn0037567	0.01746	0.03234	1.85176	Other	T
FBgn0037568	0.06384	0.14549	2.27897	Other	T
FBgn0037569	0.02174	0.06349	2.92084	Other	T
FBgn0037570	0.0531	0.08816	1.66026	Other	T
FBgn0000636	0.05913	0.07503	1.26898	Other	T
FBgn0033136	0.06565	0.11736	1.78768	Other	T
FBgn0037572	0.28341	0.5163	1.82175	Other	T
FBgn0033137	0.10485	0.15972	1.52341	Other	T
FBgn0037574	0.0758	0.1124	1.48283	Other	T
FBgn0027558	0.02366	0.04968	2.09957	Other	T
FBgn0062412	0.04907	0.10629	2.16581	Other	T
FBgn0033138	0.06881	0.11679	1.69732	Other	T
FBgn0033139	0.13959	0.55602	3.98311	Other	T
FBgn0033140	0.0321	0.05524	1.7207	Other	T
FBgn0040529	0.0355	0.0569	1.60271	Other	T
FBgn0004908	0.0112	0.0204	1.82113	Other	T
FBgn0037578	0.09182	0.20685	2.25288	Other	T
FBgn0037580	0.0346	0.07074	2.04429	Other	T
FBgn0037581	0.11957	0.30381	2.54084	Other	T
FBgn0028380	0.181	0.28893	1.59632	Other	T
FBgn0037582	0.05115	0.0961	1.87885	Other	T
FBgn0020249	0.00788	0.01319	1.67316	Other	T
FBgn0037583	0.32809	0.52534	1.6012	Other	T
FBgn0036862	0.08847	0.12924	1.46088	Other	T
FBgn0028642	0.02544	0.04514	1.77412	Other	T
FBgn0033142	0.09862	0.1456	1.47632	Other	T
FBgn0040075	0.00716	0.01316	1.83855	Other	T
FBgn0032677	0.08137	0.19888	2.44405	Other	T
FBgn0051787	0.12423	0.29603	2.38281	Other	T
FBgn0024294	0.03205	0.05224	1.63006	Other	T
FBgn0002930	0.15609	0.38588	2.4722	Other	T
FBgn0033149	0.12544	0.34316	2.73568	Other	T
FBgn0053140	0.09238	0.22958	2.48526	Other	T
FBgn0050384	0.1741	0.38544	2.21393	Other	T
FBgn0037592	0.06429	0.13267	2.06366	Other	T
FBgn0003090	0.08397	0.10662	1.26969	Other	T
FBgn0016797	0.02051	0.02718	1.32482	Other	T
FBgn0037594	0.09849	0.21397	2.17255	Other	T
FBgn0051453	0.12127	0.22495	1.85503	Other	T
FBgn0052203	0.49883	0.74559	1.49467	Other	T
FBgn0051450	0.06512	0.12806	1.96658	Other	T
FBgn0051460	0.03823	0.13767	3.6011	Other	T
FBgn0051786	0.13121	0.13545	1.03236	Other	T
FBgn0036851	0.02402	0.02634	1.09666	Other	T
FBgn0026389	0.09654	0.13147	1.36176	Other	T
FBgn0036846	0.05876	0.11589	1.97226	Other	T
FBgn0026602	0.05667	0.12986	2.29149	Other	T
FBgn0033153	0.0515	0.08664	1.68243	Other	T
FBgn0036844	0.07055	0.07869	1.11538	Other	T
FBgn0033154	0.15639	0.25391	1.62354	Other	T
FBgn0037601	0.05423	0.09521	1.75584	Other	T
FBgn0036843	0.06006	0.07656	1.27486	Other	T
FBgn0024326	0.01378	0.02147	1.55749	Other	T
FBgn0037602	0.01298	0.04331	3.33684	Other	T
FBgn0000447	0.04939	0.13933	2.82118	Other	T
FBgn0037603	0.01381	0.02439	1.76647	Other	T
FBgn0000171	0.04726	0.0478	1.01147	Other	T
FBgn0037605	0.02532	0.05395	2.13074	Other	T
FBgn0033155	0.03469	0.07833	2.25796	Other	T
FBgn0037606	0.0302	0.04274	1.41491	Other	T
FBgn0032671	0.14744	0.21157	1.43493	Other	T
FBgn0032670	0.14148	0.27133	1.91778	Other	T
FBgn0032669	0.17647	0.43515	2.46583	Other	T
FBgn0037608	0.03799	0.12278	3.2317	Other	T
FBgn0037609	0.0092	0.01473	1.60042	Other	T
FBgn0032668	0.12969	0.26352	2.03194	Other	T
FBgn0037610	0.07462	0.1547	2.07308	Other	T
FBgn0037611	0.12502	0.39728	3.17762	Other	T
FBgn0041184	0.12054	0.1667	1.38291	Other	T
FBgn0002945	0.09923	0.09359	0.94322	Other	T
FBgn0003174	0.05705	0.09097	1.59465	Other	T
FBgn0037612	0.05655	0.12573	2.2232	Other	T
FBgn0001301	0.08238	0.11754	1.42673	Other	T
FBgn0037614	0.06161	0.02642	0.42881	Other	T
FBgn0037615	0.04035	0.03325	0.82407	Other	T
FBgn0037616	0.13708	0.30258	2.20732	Other	T
FBgn0037618	0.2047	0.41058	2.00574	Other	T
FBgn0037619	0.11984	0.23006	1.91977	Other	T
FBgn0032666	0.03884	0.04277	1.10115	Other	T
FBgn0037622	0.05071	0.09862	1.94473	Other	T
FBgn0037623	0.04104	0.08919	2.173	Other	T
FBgn0032665	0.09538	0.15842	1.66091	Other	T
FBgn0037624	0.04847	0.09474	1.95461	Other	T
FBgn0037625	0.05475	0.06904	1.26103	Other	T
FBgn0037626	0.05256	0.12056	2.29351	Other	T
FBgn0037627	0.07809	0.10065	1.28895	Other	T
FBgn0053189	0.10748	0.16224	1.50946	Other	T
FBgn0046874	0.28199	0.4195	1.48764	Other	T
FBgn0032663	0.1642	0.22306	1.35851	Other	T
FBgn0036834	0.0629	0.1311	2.08418	Other	T
FBgn0037630	0.07797	0.16339	2.09552	Other	T
FBgn0037631	0.116	0.15538	1.33947	Other	T
FBgn0051741	0.11739	0.18541	1.57947	Other	T
FBgn0037632	0.00931	0.02111	2.2671	Other	T
FBgn0037633	0.11016	0.22128	2.00868	Other	T
FBgn0002939	0.07906	0.13823	1.74844	Other	T
FBgn0037634	0.08321	0.18479	2.22067	Other	T
FBgn0037635	0.12761	0.28766	2.25427	Other	T
FBgn0000120	0.00453	0.00688	1.51947	Other	T
FBgn0052204	0.11824	0.0856	0.72396	Other	T
FBgn0037638	0.01086	0.02631	2.42341	Other	T
FBgn0036831	0.05007	0.07285	1.45485	Other	T
FBgn0000352	0.06886	0.15489	2.24942	Other	T
FBgn0036829	0.0464	0.0749	1.61446	Other	T
FBgn0036828	0.00712	0.0141	1.98199	Other	T
FBgn0041243	0.05008	0.10741	2.14459	Other	T
FBgn0033162	0.03087	0.0533	1.72652	Other	T
FBgn0033166	0.10517	0.14972	1.42358	Other	T
FBgn0032661	0.04908	0.04605	0.93828	Other	T
FBgn0052499	0.02331	0.03889	1.66817	Other	T
FBgn0036817	0.0355	0.06059	1.70691	Other	T
FBgn0033168	0.07697	0.19206	2.49521	Other	T
FBgn0033169	0.06384	0.15308	2.39787	Other	T
FBgn0033170	0.06195	0.14287	2.30636	Other	T
FBgn0003015	0.16867	0.24822	1.47163	Other	T
FBgn0050503	0.1324	0.28466	2.15001	Other	T
FBgn0040513	0.00856	0.02148	2.50851	Other	T
FBgn0037643	0.06358	0.07297	1.14772	Other	T
FBgn0032659	0.29223	0.54846	1.87679	Other	T
FBgn0037644	0.02121	0.04187	1.97395	Other	T
FBgn0033174	0.13256	0.24777	1.86918	Other	T
FBgn0040989	0.21665	0.31149	1.43774	Other	T
FBgn0050502	0.09988	0.2068	2.07042	Other	T
FBgn0037645	0.04589	0.0506	1.10271	Other	T
FBgn0025885	0.03573	0.06481	1.81365	Other	T
FBgn0033178	0.07467	0.16011	2.1444	Other	T
FBgn0036814	0.0772	0.10805	1.39953	Other	T
FBgn0037646	0.0168	0.03046	1.81326	Other	T
FBgn0010548	0.07846	0.07294	0.92968	Other	T
FBgn0037647	0.02375	0.03544	1.49218	Other	T
FBgn0022347	0.1904	0.35462	1.86253	Other	T
FBgn0037648	0.00662	0.01058	1.59936	Other	T
FBgn0051100	0.06491	0.08845	1.3626	Other	T
FBgn0037652	0.12123	0.21339	1.76023	Other	T
FBgn0026380	0.01624	0.03128	1.92617	Other	T
FBgn0037653	0.07835	0.13103	1.67243	Other	T
FBgn0037654	0.17803	0.29382	1.65043	Other	T
FBgn0037655	0.13121	0.08997	0.68567	Other	T
FBgn0031196	0.07752	0.14237	1.83662	Other	T
FBgn0032656	0.02756	0.06767	2.45567	Other	T
FBgn0033182	0.04374	0.10874	2.48618	Other	T
FBgn0040534	0.00256	0.00503	1.9625	Other	T
FBgn0037656	0.05857	0.11764	2.00872	Other	T
FBgn0015014	0.00542	0.01065	1.96455	Other	T
FBgn0001078	0.10276	0.10092	0.98207	Other	T
FBgn0031194	0.05775	0.10259	1.77643	Other	T
FBgn0015929	0.00623	0.01512	2.42511	Other	T
FBgn0002932	0.0212	0.03022	1.42545	Other	T
FBgn0011285	0.02634	0.04862	1.84609	Other	T
FBgn0015933	0.02689	0.04949	1.84016	Other	T
FBgn0037657	0.02108	0.02874	1.36348	Other	T
FBgn0033184	0.02625	0.05489	2.09077	Other	T
FBgn0014018	0.14569	0.22883	1.57062	Other	T
FBgn0010222	0.04598	0.10069	2.18967	Other	T
FBgn0025185	0.08646	0.19849	2.29569	Other	T
FBgn0033185	0.09042	0.24168	2.67302	Other	T
FBgn0036813	0.0191	0.0303	1.58615	Other	T
FBgn0036812	0.24704	0.42977	1.73971	Other	T
FBgn0033186	0.10661	0.23097	2.16663	Other	T
FBgn0036811	0.02378	0.0512	2.15259	Other	T
FBgn0036810	0.11974	0.2248	1.87745	Other	T
FBgn0033187	0.0913	0.15363	1.68278	Other	T
FBgn0037660	0.0281	0.06686	2.37913	Other	T
FBgn0037661	0.14271	0.24903	1.74497	Other	T
FBgn0022772	0.06844	0.13302	1.94363	Other	T
FBgn0033188	0.0379	0.04064	1.07226	Other	T
FBgn0033189	0.02085	0.02936	1.40823	Other	T
FBgn0033191	0.01153	0.02312	2.0056	Other	T
FBgn0036808	0.13964	0.36142	2.58828	Other	T
FBgn0033192	0.04292	0.07529	1.75423	Other	T
FBgn0036807	0.08694	0.33389	3.84033	Other	T
FBgn0031191	0.21527	0.35997	1.67215	Other	T
FBgn0050499	0.06149	0.08887	1.4452	Other	T
FBgn0031190	0.11127	0.14728	1.32358	Other	T
FBgn0004132	0.03876	0.14697	3.79214	Other	T
FBgn0036805	0.00932	0.0195	2.09286	Other	T
FBgn0052202	0.06919	0.18814	2.71912	Other	T
FBgn0036804	0.04111	0.09547	2.32239	Other	T
FBgn0031189	0.0914	0.21865	2.39231	Other	T
FBgn0040323	0.10502	0.19605	1.86681	Other	T
FBgn0031188	0.09643	0.1432	1.48514	Other	T
FBgn0040322	0.06418	0.18462	2.87673	Other	T
FBgn0003165	0.03975	0.04105	1.03271	Other	T
FBgn0042134	0.12027	0.18546	1.54208	Other	T
FBgn0004133	0.07191	0.12847	1.78646	Other	T
FBgn0031187	0.06261	0.0801	1.27942	Other	T
FBgn0033195	0.16092	0.26836	1.66767	Other	T
FBgn0037662	0.13151	0.23136	1.75931	Other	T
FBgn0031186	0.00355	0.0026	0.73167	Other	T
FBgn0036801	0.05183	0.06562	1.26614	Other	T
FBgn0014395	0.08383	0.19655	2.34475	Other	T
FBgn0031184	0.11044	0.20134	1.82297	Other	T
FBgn0031183	0.02257	0.04377	1.93935	Other	T
FBgn0033196	0.0548	0.06629	1.20977	Other	T
FBgn0036800	0.06164	0.12037	1.95268	Other	T
FBgn0013717	0.01047	0.01406	1.34345	Other	T
FBgn0052199	0.14605	0.28117	1.92514	Other	T
FBgn0036793	0.19361	0.5156	2.66305	Other	T
FBgn0036796	0.19448	0.47244	2.42928	Other	T
FBgn0036794	0.23559	0.53862	2.28627	Other	T
FBgn0037663	0.01697	0.03321	1.95665	Other	T
FBgn0037664	0.05956	0.06629	1.11296	Other	T
FBgn0050492	0.09434	0.10409	1.10339	Other	T
FBgn0037665	0.05704	0.11232	1.96895	Other	T
FBgn0037667	0.18741	0.28839	1.53881	Other	T
FBgn0037668	0.17854	0.47013	2.63324	Other	T
FBgn0037669	0.08139	0.20612	2.53238	Other	T
FBgn0037670	0.08972	0.19538	2.17756	Other	T
FBgn0037671	0.05205	0.09006	1.7304	Other	T
FBgn0037672	0.07514	0.11065	1.47257	Other	T
FBgn0010803	0.02244	0.04299	1.91635	Other	T
FBgn0037674	0.04862	0.10917	2.24541	Other	T
FBgn0033199	0.05125	0.09074	1.77044	Other	T
FBgn0050491	0.05191	0.10137	1.95267	Other	T
FBgn0050495	0.07705	0.15287	1.98385	Other	T
FBgn0036790	0.04197	0.07903	1.88289	Other	T
FBgn0033207	0.06954	0.1498	2.15429	Other	T
FBgn0033208	0.11506	0.20118	1.74856	Other	T
FBgn0033209	0.02184	0.03896	1.78421	Other	T
FBgn0037676	0.11867	0.10598	0.8931	Other	T
FBgn0033210	0.02777	0.05914	2.13008	Other	T
FBgn0037675	0.14907	0.51035	3.42356	Other	T
FBgn0037678	0.13281	0.20818	1.56754	Other	T
FBgn0037679	0.04993	0.07654	1.53299	Other	T
FBgn0037680	0.01998	0.02291	1.14638	Other	T
FBgn0053936	0.23576	0.13639	0.57853	Other	T
FBgn0037683	0.0253	0.03591	1.41948	Other	T
FBgn0036789	0.07398	0.11318	1.53004	Other	T
FBgn0000723	0.05008	0.06458	1.28957	Other	T
FBgn0042135	0.02213	0.01721	0.77761	Other	T
FBgn0037687	0.04582	0.09694	2.1155	Other	T
FBgn0037689	0.02781	0.0501	1.80176	Other	T
FBgn0037690	0.00572	0.00799	1.39658	Other	T
FBgn0011740	0.03776	0.09248	2.44944	Other	T
FBgn0036787	0.24933	0.39729	1.59344	Other	T
FBgn0052196	0.16337	0.25195	1.54215	Other	T
FBgn0026188	0.05699	0.03692	0.64784	Other	T
FBgn0050497	0.01683	0.02265	1.34566	Other	T
FBgn0037696	0.12547	0.3347	2.66762	Other	T
FBgn0037697	0.0001	0.00011	1.07411	Other	T
FBgn0037698	0.08714	0.12609	1.44688	Other	T
FBgn0043791	0.05843	0.09282	1.58855	Other	T
FBgn0033221	0.21206	0.30265	1.42717	Other	T
FBgn0014380	0.07898	0.11038	1.39748	Other	T
FBgn0011706	0.1014	0.09571	0.9439	Other	T
FBgn0037701	0.04561	0.0668	1.46444	Other	T
FBgn0003205	0.0001	0.0001	1.03199	Other	T
FBgn0014022	0.13611	0.26042	1.91331	Other	T
FBgn0014023	0.05234	0.09484	1.81186	Other	T
FBgn0037703	0.05557	0.10174	1.83094	Other	T
FBgn0033226	0.06058	0.10624	1.75364	Other	T
FBgn0037705	0.0518	0.08516	1.64386	Other	T
FBgn0029093	0.02024	0.03874	1.91439	Other	T
FBgn0037708	0.09848	0.20237	2.05487	Other	T
FBgn0037709	0.05251	0.09769	1.86038	Other	T
FBgn0003082	0.05952	0.12749	2.14205	Other	T
FBgn0024833	0.0001	0.00026	2.56874	Other	T
FBgn0027950	0.09038	0.13321	1.47391	Other	T
FBgn0037710	0.04284	0.05823	1.35938	Other	T
FBgn0037711	0.01436	0.03861	2.68799	Other	T
FBgn0037712	0.01519	0.03558	2.3413	Other	T
FBgn0033229	0.05218	0.0869	1.66526	Other	T
FBgn0037713	0.09718	0.25173	2.59029	Other	T
FBgn0040780	0.1287	0.22868	1.77678	Other	T
FBgn0037714	0.08236	0.14705	1.78546	Other	T
FBgn0037715	0.09819	0.1131	1.15184	Other	T
FBgn0027338	0.0351	0.03777	1.07617	Other	T
FBgn0037716	0.1063	0.23073	2.17056	Other	T
FBgn0037717	0.0583	0.107	1.83546	Other	T
FBgn0004568	0.06327	0.06593	1.04208	Other	T
FBgn0037718	0.04188	0.08373	1.99928	Other	T
FBgn0037719	0.15818	0.29163	1.84361	Other	T
FBgn0037720	0.06075	0.09162	1.50814	Other	T
FBgn0037721	0.07983	0.10243	1.28309	Other	T
FBgn0015946	0.1677	0.18032	1.07523	Other	T
FBgn0005585	0.01871	0.03003	1.60457	Other	T
FBgn0036785	0.2905	0.5196	1.78864	Other	T
FBgn0037723	0.02277	0.03629	1.59431	Other	T
FBgn0012344	0.20163	0.22142	1.09813	Other	T
FBgn0037728	0.03973	0.07047	1.77368	Other	T
FBgn0028997	0.0409	0.1059	2.58909	Other	T
FBgn0037730	0.04575	0.10413	2.27588	Other	T
FBgn0069242	0.00997	0.01932	1.93783	Other	T
FBgn0032653	0.026	0.04322	1.66219	Other	T
FBgn0033232	0.23572	0.30722	1.30336	Other	T
FBgn0032652	0.04697	0.11783	2.50863	Other	T
FBgn0015509	0.01698	0.03531	2.07967	Other	T
FBgn0032651	0.01803	0.02884	1.59915	Other	T
FBgn0026393	0.13369	0.26404	1.97506	Other	T
FBgn0033233	0.0459	0.09764	2.12732	Other	T
FBgn0052937	0.07107	0.11406	1.60484	Other	T
FBgn0050381	0.09146	0.16837	1.84097	Other	T
FBgn0037735	0.03519	0.05943	1.68873	Other	T
FBgn0023171	0.10406	0.21348	2.05153	Other	T
FBgn0026722	0.04007	0.10004	2.49692	Other	T
FBgn0037736	0.03245	0.05325	1.64103	Other	T
FBgn0033235	0.0268	0.05934	2.21378	Other	T
FBgn0050380	0.08841	0.13875	1.56938	Other	T
FBgn0037739	0.14741	0.13441	0.91176	Other	T
FBgn0005777	0.04535	0.06564	1.44725	Other	T
FBgn0037741	0.09324	0.19533	2.09488	Other	T
FBgn0033236	0.09019	0.14931	1.65559	Other	T
FBgn0037743	0.08959	0.14131	1.57732	Other	T
FBgn0037744	0.05403	0.14082	2.60608	Other	T
FBgn0037747	0.00881	0.01692	1.92168	Other	T
FBgn0037749	0.04774	0.09878	2.06925	Other	T
FBgn0037750	0.17448	0.25021	1.43403	Other	T
FBgn0037751	0.11374	0.23142	2.03461	Other	T
FBgn0002868	0.17788	0.05129	0.28831	Other	T
FBgn0027548	0.0123	0.02287	1.85909	Other	T
FBgn0033243	0.04372	0.094	2.15016	Other	T
FBgn0003997	0.12703	0.11154	0.87802	Other	T
FBgn0037755	0.3596	0.46237	1.28579	Other	T
FBgn0037756	0.02922	0.11377	3.89319	Other	T
FBgn0033244	0.05911	0.07759	1.31262	Other	T
FBgn0037757	0.05244	0.08896	1.69637	Other	T
FBgn0027054	0.01948	0.03878	1.99105	Other	T
FBgn0037758	0.02927	0.0501	1.71156	Other	T
FBgn0037760	0.01963	0.03003	1.52927	Other	T
FBgn0033246	0.0191	0.02958	1.54839	Other	T
FBgn0036781	0.09111	0.12363	1.35687	Other	T
FBgn0036780	0.07284	0.09633	1.32242	Other	T
FBgn0033247	0.01266	0.03415	2.69803	Other	T
FBgn0033248	0.11993	0.24179	2.01613	Other	T
FBgn0020300	0.10913	0.12124	1.11088	Other	T
FBgn0027788	0.03811	0.09813	2.57506	Other	T
FBgn0033249	0.08149	0.18615	2.28442	Other	T
FBgn0037766	0.02329	0.01727	0.74173	Other	T
FBgn0036778	0.06945	0.16076	2.31458	Other	T
FBgn0036777	0.20538	0.40605	1.9771	Other	T
FBgn0002901	0.10178	0.20081	1.97306	Other	T
FBgn0040536	0.16846	0.13767	0.81724	Other	T
FBgn0032646	0.03821	0.09118	2.38631	Other	T
FBgn0036775	0.07762	0.16962	2.1853	Other	T
FBgn0032645	0.20577	0.35632	1.73166	Other	T
FBgn0003187	0.04616	0.08323	1.80305	Other	T
FBgn0036773	0.02875	0.02359	0.82049	Other	T
FBgn0032644	0.05582	0.10368	1.85744	Other	T
FBgn0032643	0.07639	0.15862	2.07638	Other	T
FBgn0032642	0.01387	0.02377	1.71365	Other	T
FBgn0024689	0.02705	0.05394	1.99374	Other	T
FBgn0027885	0.03029	0.05114	1.68858	Other	T
FBgn0032640	0.12014	0.21806	1.81502	Other	T
FBgn0031180	0.19383	0.16927	0.87327	Other	T
FBgn0000183	0.02183	0.03415	1.56413	Other	T
FBgn0032637	0.45787	0.70719	1.54452	Other	T
FBgn0020279	0.09975	0.10743	1.07699	Other	T
FBgn0025469	0.04375	0.0458	1.04703	Other	T
FBgn0028563	0.05751	0.07212	1.25411	Other	T
FBgn0000462	0.02175	0.02624	1.20671	Other	T
FBgn0037770	0.02131	0.02893	1.35753	Other	T
FBgn0028562	0.07201	0.12979	1.80223	Other	T
FBgn0033257	0.02656	0.05176	1.94894	Other	T
FBgn0032636	0.18711	0.33423	1.78621	Other	T
FBgn0037773	0.16525	0.23533	1.42409	Other	T
FBgn0033258	0.38478	0.56677	1.47298	Other	T
FBgn0033259	0.04249	0.09452	2.22463	Other	T
FBgn0051407	0.10315	0.22356	2.16741	Other	T
FBgn0011274	0.29027	0.4008	1.38081	Other	T
FBgn0050372	0.0108	0.01873	1.73377	Other	T
FBgn0051803	0.02387	0.04565	1.91241	Other	T
FBgn0032635	0.06093	0.11305	1.8554	Other	T
FBgn0032634	0.00805	0.01083	1.34521	Other	T
FBgn0027524	0.02532	0.06424	2.53756	Other	T
FBgn0033264	0.18498	0.28856	1.55996	Other	T
FBgn0037777	0.06967	0.11495	1.64988	Other	T
FBgn0020272	0.09456	0.17988	1.90231	Other	T
FBgn0037778	0.07932	0.15543	1.9596	Other	T
FBgn0033265	0.37921	0.6654	1.75471	Other	T
FBgn0037779	0.11283	0.15454	1.36961	Other	T
FBgn0037780	0.06809	0.13564	1.99193	Other	T
FBgn0033266	0.04136	0.07732	1.86928	Other	T
FBgn0037781	0.14043	0.29774	2.12018	Other	T
FBgn0001565	0.04592	0.08616	1.87649	Other	T
FBgn0033267	0.12191	0.28942	2.3741	Other	T
FBgn0037782	0.06277	0.12094	1.92656	Other	T
FBgn0005648	0.01299	0.01718	1.3224	Other	T
FBgn0037783	0.1261	0.15796	1.25268	Other	T
FBgn0033268	0.06307	0.12867	2.04015	Other	T
FBgn0033269	0.05216	0.08503	1.6302	Other	T
FBgn0037786	0.16597	0.29458	1.77485	Other	T
FBgn0024182	0.03876	0.0819	2.11301	Other	T
FBgn0024251	0.15945	0.20676	1.29669	Other	T
FBgn0033271	0.09848	0.19151	1.94468	Other	T
FBgn0028734	0.08658	0.07194	0.83092	Other	T
FBgn0032633	0.07209	0.09698	1.34516	Other	T
FBgn0033272	0.02191	0.03452	1.57528	Other	T
FBgn0050373	0.08461	0.17644	2.08539	Other	T
FBgn0021995	0.0147	0.03324	2.2614	Other	T
FBgn0003464	0.05285	0.09302	1.76	Other	T
FBgn0037788	0.10042	0.28238	2.81214	Other	T
FBgn0033273	0.12108	0.26276	2.17016	Other	T
FBgn0011659	0.0622	0.1325	2.13024	Other	T
FBgn0001321	0.0505	0.08022	1.58845	Other	T
FBgn0033274	0.04518	0.11112	2.45946	Other	T
FBgn0015527	0.08003	0.14561	1.81956	Other	T
FBgn0015379	0.05658	0.09297	1.64318	Other	T
FBgn0036772	0.06812	0.13739	2.01684	Other	T
FBgn0004889	0.01158	0.00869	0.75073	Other	T
FBgn0036771	0.03332	0.05657	1.69785	Other	T
FBgn0000709	0.02589	0.04765	1.84045	Other	T
FBgn0037792	0.13181	0.29744	2.25651	Other	T
FBgn0036770	0.06037	0.08922	1.47791	Other	T
FBgn0002478	0.02691	0.04675	1.73713	Other	T
FBgn0036769	0.00426	0.00383	0.90034	Other	T
FBgn0036768	0.0946	0.16552	1.74968	Other	T
FBgn0040238	0.05011	0.07957	1.5878	Other	T
FBgn0031174	0.04203	0.06226	1.48127	Other	T
FBgn0036765	0.09661	0.16568	1.71488	Other	T
FBgn0037796	0.05183	0.041	0.79115	Other	T
FBgn0029067	0.0001	0.00011	1.11737	Other	T
FBgn0033275	0.23529	0.45485	1.93315	Other	T
FBgn0064116	0.07924	0.23038	2.90742	Other	T
FBgn0064117	0.03197	0.03413	1.06732	Other	T
FBgn0031171	0.0839	0.1895	2.25867	Other	T
FBgn0025879	0.20794	0.28281	1.36006	Other	T
FBgn0036763	0.08747	0.18991	2.17104	Other	T
FBgn0036762	0.02667	0.03634	1.36252	Other	T
FBgn0036761	0.02119	0.03057	1.44262	Other	T
FBgn0010109	0.05576	0.07145	1.28139	Other	T
FBgn0036760	0.05668	0.10552	1.8618	Other	T
FBgn0036759	0.13393	0.15558	1.16166	Other	T
FBgn0037797	0.09078	0.19709	2.17109	Other	T
FBgn0037798	0.01201	0.03561	2.96593	Other	T
FBgn0037799	0.05403	0.09181	1.69928	Other	T
FBgn0001134	0.1023	0.12932	1.26408	Other	T
FBgn0013726	0.01546	0.02625	1.69812	Other	T
FBgn0031169	0.12735	0.34759	2.72937	Other	T
FBgn0037801	0.01023	0.01907	1.86467	Other	T
FBgn0036756	0.021	0.03704	1.76401	Other	T
FBgn0032632	0.16854	0.35687	2.11746	Other	T
FBgn0040078	0.0063	0.01044	1.65713	Other	T
FBgn0052187	0.07014	0.1406	2.00457	Other	T
FBgn0033278	0.29108	0.5636	1.9362	Other	T
FBgn0036754	0.0847	0.16175	1.90971	Other	T
FBgn0050376	0.19785	0.4685	2.36799	Other	T
FBgn0052190	0.02895	0.06976	2.40955	Other	T
FBgn0050375	0.06595	0.12507	1.89627	Other	T
FBgn0050371	0.11292	0.17198	1.52303	Other	T
FBgn0037807	0.02512	0.04105	1.63438	Other	T
FBgn0036752	0.09549	0.16239	1.70052	Other	T
FBgn0043025	0.12045	0.25298	2.10027	Other	T
FBgn0015396	0.072	0.12729	1.76781	Other	T
FBgn0052183	0.17535	0.10959	0.62496	Other	T
FBgn0032629	0.15451	0.12942	0.83761	Other	T
FBgn0037813	0.04858	0.07791	1.60368	Other	T
FBgn0037814	0.05779	0.10623	1.83814	Other	T
FBgn0037815	0.05443	0.13884	2.55055	Other	T
FBgn0037816	0.07309	0.15608	2.13538	Other	T
FBgn0031163	0.60533	1.06113	1.75296	Other	T
FBgn0033283	0.16813	0.34675	2.06242	Other	T
FBgn0037817	0.0782	0.16627	2.12611	Other	T
FBgn0050366	0.23742	0.42934	1.80836	Other	T
FBgn0050363	0.11824	0.38015	3.21502	Other	T
FBgn0033286	0.10255	0.25527	2.48917	Other	T
FBgn0036745	0.04646	0.07703	1.65817	Other	T
FBgn0052179	0.08185	0.12824	1.56669	Other	T
FBgn0052177	0.03486	0.04582	1.31431	Other	T
FBgn0033288	0.05751	0.07218	1.25511	Other	T
FBgn0036742	0.05974	0.11384	1.90552	Other	T
FBgn0036741	0.04746	0.07233	1.52406	Other	T
FBgn0032627	0.09223	0.10162	1.10183	Other	T
FBgn0033289	0.03881	0.06429	1.65678	Other	T
FBgn0036740	0.01889	0.03738	1.97865	Other	T
FBgn0033292	0.06095	0.08748	1.43528	Other	T
FBgn0001235	0.0001	2e-05	0.19857	Other	T
FBgn0003950	0.25538	0.39971	1.56513	Other	T
FBgn0002569	0.05702	0.09924	1.74054	Other	T
FBgn0025455	0.07724	0.12606	1.63207	Other	T
FBgn0031157	0.1443	0.31626	2.19171	Other	T
FBgn0036738	0.09943	0.21123	2.12441	Other	T
FBgn0023197	0.12436	0.21705	1.74536	Other	T
FBgn0031155	0.4057	0.57863	1.42626	Other	T
FBgn0036736	0.06297	0.06388	1.01447	Other	T
FBgn0036735	0.09945	0.10926	1.09868	Other	T
FBgn0036734	0.02829	0.04881	1.72509	Other	T
FBgn0032626	0.29961	0.50267	1.67775	Other	T
FBgn0036733	0.03284	0.04893	1.48982	Other	T
FBgn0036732	0.03567	0.05148	1.44331	Other	T
FBgn0052185	0.24683	0.4273	1.73119	Other	T
FBgn0031150	0.05479	0.06076	1.10888	Other	T
FBgn0036729	0.17973	0.44609	2.48204	Other	T
FBgn0036728	0.0465	0.04815	1.03539	Other	T
FBgn0036727	0.0277	0.06894	2.48871	Other	T
FBgn0020385	0.02957	0.06292	2.12799	Other	T
FBgn0036726	0.06565	0.14665	2.23398	Other	T
FBgn0031148	0.05293	0.09149	1.72843	Other	T
FBgn0037824	0.1976	0.29944	1.51538	Other	T
FBgn0051278	0.08668	0.16504	1.9041	Other	T
FBgn0051373	0.09983	0.144	1.44247	Other	T
FBgn0025814	0.04876	0.09435	1.93477	Other	T
FBgn0037827	0.31548	0.68237	2.16293	Other	T
FBgn0032625	0.30651	0.53943	1.75993	Other	T
FBgn0031146	0.00172	0.00346	2.01689	Other	T
FBgn0036725	0.07283	0.13273	1.82251	Other	T
FBgn0037828	0.15863	0.29111	1.83509	Other	T
FBgn0004841	0.02831	0.02832	1.0003	Other	T
FBgn0052176	0.12682	0.24618	1.94117	Other	T
FBgn0036723	0.03853	0.09572	2.48427	Other	T
FBgn0042641	0.04267	0.07752	1.81671	Other	T
FBgn0033301	0.19528	0.40665	2.08243	Other	T
FBgn0031142	0.08245	0.22907	2.77826	Other	T
FBgn0052174	0.07703	0.09862	1.28019	Other	T
FBgn0053052	0.07486	0.13879	1.85412	Other	T
FBgn0053051	0.05516	0.1145	2.07573	Other	T
FBgn0040793	0.12349	0.09953	0.80597	Other	T
FBgn0036718	0.01546	0.0359	2.32288	Other	T
FBgn0051390	0.01625	0.03529	2.1721	Other	T
FBgn0037831	0.19955	0.33584	1.68297	Other	T
FBgn0010421	0.01523	0.05307	3.48515	Other	T
FBgn0027660	0.0458	0.07429	1.62209	Other	T
FBgn0037832	0.03063	0.0696	2.27222	Other	T
FBgn0037833	0.0788	0.1671	2.1207	Other	T
FBgn0032624	0.257	0.51537	2.00531	Other	T
FBgn0037834	0.01746	0.03524	2.01868	Other	T
FBgn0033305	0.02625	0.04464	1.70063	Other	T
FBgn0017577	0.01167	0.02212	1.89616	Other	T
FBgn0037835	0.08926	0.11016	1.23409	Other	T
FBgn0033306	0.11075	0.12056	1.0886	Other	T
FBgn0033307	0.01384	0.02613	1.88858	Other	T
FBgn0036716	0.10122	0.18218	1.79985	Other	T
FBgn0037838	0.07695	0.16364	2.12665	Other	T
FBgn0036715	0.03549	0.07801	2.19778	Other	T
FBgn0033309	0.134	0.14521	1.0836	Other	T
FBgn0053179	0.06834	0.05283	0.77298	Other	T
FBgn0033310	0.08075	0.14798	1.83271	Other	T
FBgn0015550	0.06432	0.13178	2.04882	Other	T
FBgn0037841	0.18575	0.2485	1.33779	Other	T
FBgn0037842	0.06608	0.11989	1.81426	Other	T
FBgn0037843	0.01217	0.01928	1.58419	Other	T
FBgn0037844	0.07089	0.15943	2.24898	Other	T
FBgn0036713	0.08403	0.1365	1.62434	Other	T
FBgn0037845	0.079	0.12273	1.5536	Other	T
FBgn0037846	0.06938	0.12515	1.80381	Other	T
FBgn0033313	0.04386	0.06498	1.4813	Other	T
FBgn0037847	0.07549	0.06224	0.82438	Other	T
FBgn0037848	0.01694	0.04462	2.63319	Other	T
FBgn0036710	0.05948	0.1132	1.90327	Other	T
FBgn0022027	0.05868	0.13117	2.23522	Other	T
FBgn0011768	0.01329	0.02517	1.89392	Other	T
FBgn0037849	0.01983	0.03692	1.86186	Other	T
FBgn0037850	0.19799	0.48079	2.42833	Other	T
FBgn0033317	0.02727	0.04046	1.48384	Other	T
FBgn0037852	0.03784	0.05561	1.4697	Other	T
FBgn0036709	0.09524	0.17796	1.86844	Other	T
FBgn0037853	0.06785	0.12943	1.90766	Other	T
FBgn0036708	0.30624	0.62327	2.03522	Other	T
FBgn0042094	0.1008	0.24675	2.44778	Other	T
FBgn0036707	0.09089	0.25572	2.81353	Other	T
FBgn0037856	0.04521	0.07936	1.75514	Other	T
FBgn0037855	0.1115	0.22619	2.02865	Other	T
FBgn0036706	0.11099	0.19289	1.73789	Other	T
FBgn0003892	0.03344	0.05495	1.64336	Other	T
FBgn0037857	0.24638	0.4286	1.73961	Other	T
FBgn0010609	0.02723	0.0402	1.47635	Other	T
FBgn0050354	0.01972	0.12633	6.40554	Other	T
FBgn0050355	0.36868	0.63505	1.72249	Other	T
FBgn0036704	0.06075	0.13885	2.28575	Other	T
FBgn0033321	0.10828	0.28021	2.58784	Other	T
FBgn0032620	0.10159	0.28926	2.84732	Other	T
FBgn0033322	0.12646	0.27096	2.14264	Other	T
FBgn0036702	0.02264	0.04925	2.17565	Other	T
FBgn0051805	0.30971	0.57637	1.86103	Other	T
FBgn0032619	0.02862	0.05407	1.88915	Other	T
FBgn0040985	0.00852	0.00909	1.06723	Other	T
FBgn0001560	0.20382	0.3639	1.7854	Other	T
FBgn0032618	0.03979	0.08715	2.19012	Other	T
FBgn0052832	0.14588	0.29445	2.01839	Other	T
FBgn0005695	0.04129	0.07811	1.89185	Other	T
FBgn0050356	0.36984	0.69445	1.8777	Other	T
FBgn0025937	0.00999	0.02139	2.14014	Other	T
FBgn0031134	0.19842	0.44942	2.26503	Other	T
FBgn0027585	0.05344	0.09946	1.86093	Other	T
FBgn0032614	0.06605	0.14084	2.1324	Other	T
FBgn0037860	0.16158	0.42247	2.61459	Other	T
FBgn0032613	0.13363	0.26018	1.94701	Other	T
FBgn0032612	0.07101	0.13106	1.84563	Other	T
FBgn0040256	0.10443	0.21046	2.01528	Other	T
FBgn0051739	0.06187	0.11313	1.82869	Other	T
FBgn0031132	0.10518	0.21584	2.05215	Other	T
FBgn0022213	0.05246	0.09676	1.84431	Other	T
FBgn0004797	0.02051	0.03996	1.94873	Other	T
FBgn0033330	0.253	0.42909	1.69601	Other	T
FBgn0032607	0.14264	0.1973	1.38321	Other	T
FBgn0027584	0.08004	0.15463	1.93198	Other	T
FBgn0032609	0.07064	0.16912	2.39423	Other	T
FBgn0026315	0.20316	0.26742	1.31629	Other	T
FBgn0040250	0.21599	0.39517	1.82957	Other	T
FBgn0037870	0.19575	0.2433	1.24287	Other	T
FBgn0032603	0.09681	0.19995	2.06533	Other	T
FBgn0037872	0.06014	0.10222	1.69967	Other	T
FBgn0000406	0.03892	0.05897	1.51533	Other	T
FBgn0037873	0.02628	0.06399	2.4351	Other	T
FBgn0037874	0.01506	0.03865	2.56582	Other	T
FBgn0003037	0.0001	4e-05	0.35481	Other	T
FBgn0037875	0.01453	0.03138	2.15996	Other	T
FBgn0010413	0.0001	6e-05	0.59398	Other	T
FBgn0037876	0.08506	0.16812	1.9764	Other	T
FBgn0037877	0.17625	0.31623	1.7942	Other	T
FBgn0037878	0.03	0.11847	3.94949	Other	T
FBgn0020910	0.01837	0.01448	0.7886	Other	T
FBgn0037880	0.05843	0.11322	1.93763	Other	T
FBgn0037881	0.04686	0.10194	2.17537	Other	T
FBgn0037882	0.0515	0.15353	2.98138	Other	T
FBgn0037883	0.01648	0.02843	1.72478	Other	T
FBgn0037884	0.02955	0.04808	1.62721	Other	T
FBgn0036697	0.0235	0.0211	0.89776	Other	T
FBgn0037890	0.08009	0.09287	1.15966	Other	T
FBgn0037891	0.05246	0.07309	1.39325	Other	T
FBgn0010424	0.00701	0.00765	1.09162	Other	T
FBgn0036696	0.06588	0.12161	1.84596	Other	T
FBgn0036695	0.03202	0.05851	1.82735	Other	T
FBgn0036691	0.05284	0.09685	1.83295	Other	T
FBgn0032602	0.0675	0.13426	1.98914	Other	T
FBgn0036690	0.06759	0.15157	2.24254	Other	T
FBgn0032601	0.07706	0.12226	1.58651	Other	T
FBgn0036689	0.07796	0.19054	2.44397	Other	T
FBgn0036686	0.02415	0.06212	2.57267	Other	T
FBgn0011286	0.00767	0.01138	1.48267	Other	T
FBgn0036685	0.02334	0.03841	1.64556	Other	T
FBgn0032600	0.05748	0.08252	1.43575	Other	T
FBgn0032599	0.01178	0.01621	1.37665	Other	T
FBgn0032598	0.0322	0.05286	1.64147	Other	T
FBgn0015391	0.0629	0.13311	2.11605	Other	T
FBgn0033337	0.03392	0.07565	2.23036	Other	T
FBgn0032597	0.05219	0.0837	1.60396	Other	T
FBgn0021825	0.0161	0.03554	2.20829	Other	T
FBgn0031129	0.15226	0.42725	2.80606	Other	T
FBgn0032596	0.03954	0.07813	1.97596	Other	T
FBgn0032595	0.03273	0.07428	2.26965	Other	T
FBgn0051812	0.17083	0.26905	1.57489	Other	T
FBgn0027593	0.05596	0.09407	1.68117	Other	T
FBgn0033339	0.05638	0.08397	1.48946	Other	T
FBgn0027513	0.1318	0.22526	1.70906	Other	T
FBgn0033340	0.15705	0.23881	1.52057	Other	T
FBgn0027779	0.02998	0.0306	1.02074	Other	T
FBgn0033341	0.10059	0.17947	1.78418	Other	T
FBgn0036683	0.12372	0.21473	1.73565	Other	T
FBgn0004921	0.00911	0.01711	1.87723	Other	T
FBgn0000409	0.0001	6e-05	0.59669	Other	T
FBgn0033342	0.01761	0.02999	1.70241	Other	T
FBgn0050349	0.08636	0.15053	1.74303	Other	T
FBgn0000408	0.04254	0.08206	1.92923	Other	T
FBgn0033344	0.11752	0.2514	2.13929	Other	T
FBgn0002552	0.04392	0.08497	1.93446	Other	T
FBgn0033347	0.20351	0.38197	1.87689	Other	T
FBgn0033348	0.14973	0.30466	2.03473	Other	T
FBgn0033349	0.05557	0.11341	2.04078	Other	T
FBgn0033350	0.12228	0.24779	2.02636	Other	T
FBgn0033351	0.06978	0.10432	1.49502	Other	T
FBgn0029128	0.01139	0.01929	1.69418	Other	T
FBgn0033352	0.05993	0.10759	1.79526	Other	T
FBgn0036681	0.07045	0.0843	1.1966	Other	T
FBgn0004595	0.03849	0.04067	1.05657	Other	T
FBgn0036679	0.23348	0.31199	1.33626	Other	T
FBgn0033354	0.08284	0.17825	2.15168	Other	T
FBgn0003300	0.04277	0.08114	1.89714	Other	T
FBgn0033355	0.04641	0.08045	1.73343	Other	T
FBgn0027607	0.01573	0.03379	2.14861	Other	T
FBgn0036677	0.12131	0.20058	1.65345	Other	T
FBgn0036676	0.21665	0.36864	1.70153	Other	T
FBgn0037892	0.05342	0.09862	1.8462	Other	T
FBgn0037893	0.02844	0.03914	1.3765	Other	T
FBgn0011774	0.07147	0.1866	2.61076	Other	T
FBgn0002652	0.21212	0.43619	2.05631	Other	T
FBgn0033357	0.11032	0.15177	1.37574	Other	T
FBgn0037894	0.03324	0.06882	2.07034	Other	T
FBgn0001185	0.17965	0.35358	1.96812	Other	T
FBgn0011300	0.0596	0.09326	1.56467	Other	T
FBgn0040373	0.08408	0.14658	1.74324	Other	T
FBgn0037898	0.07029	0.09792	1.39308	Other	T
FBgn0037899	0.03068	0.05084	1.65712	Other	T
FBgn0037900	0.06248	0.1044	1.671	Other	T
FBgn0037901	0.08393	0.1988	2.36853	Other	T
FBgn0040372	0.08181	0.15102	1.84601	Other	T
FBgn0037902	0.01775	0.03661	2.06284	Other	T
FBgn0033358	0.10197	0.16404	1.60868	Other	T
FBgn0051374	0.0508	0.06732	1.32529	Other	T
FBgn0036672	0.00192	0.00138	0.72066	Other	T
FBgn0000316	0.11867	0.25694	2.1652	Other	T
FBgn0037906	0.09596	0.12213	1.27268	Other	T
FBgn0033359	0.06754	0.09273	1.37306	Other	T
FBgn0040369	0.09243	0.12491	1.35135	Other	T
FBgn0031126	0.03122	0.06377	2.04239	Other	T
FBgn0036671	0.07565	0.13758	1.81855	Other	T
FBgn0005427	0.01648	0.02907	1.76375	Other	T
FBgn0033360	0.00805	0.01144	1.42112	Other	T
FBgn0051738	0.05527	0.09244	1.67251	Other	T
FBgn0033361	0.2161	0.27706	1.28208	Other	T
FBgn0036669	0.08436	0.16565	1.96369	Other	T
FBgn0003250	0.01223	0.02129	1.74115	Other	T
FBgn0003410	0.0056	0.00684	1.22266	Other	T
FBgn0037908	0.04765	0.06425	1.34842	Other	T
FBgn0036668	0.15465	0.27786	1.79666	Other	T
FBgn0052161	0.11913	0.26572	2.23056	Other	T
FBgn0036667	0.02908	0.04267	1.46731	Other	T
FBgn0036666	0.05959	0.093	1.56076	Other	T
FBgn0033362	0.04553	0.07466	1.63987	Other	T
FBgn0040370	0.02737	0.05461	1.99539	Other	T
FBgn0033363	0.0419	0.0817	1.95006	Other	T
FBgn0033364	0.13984	0.16837	1.20399	Other	T
FBgn0021768	0.08206	0.10844	1.32153	Other	T
FBgn0040371	0.00593	0.0095	1.60148	Other	T
FBgn0036665	0.05898	0.06261	1.06152	Other	T
FBgn0037911	0.03515	0.063	1.7923	Other	T
FBgn0029521	0.11221	0.22074	1.96716	Other	T
FBgn0033368	0.03275	0.03586	1.09488	Other	T
FBgn0037917	0.0105	0.01518	1.44555	Other	T
FBgn0025582	0.00376	0.00554	1.47189	Other	T
FBgn0052816	0.1016	0.1939	1.90846	Other	T
FBgn0036662	0.03942	0.08108	2.05663	Other	T
FBgn0037918	0.08095	0.18716	2.31198	Other	T
FBgn0036661	0.04913	0.03971	0.80824	Other	T
FBgn0036660	0.0821	0.15202	1.85168	Other	T
FBgn0033369	0.07694	0.26208	3.40643	Other	T
FBgn0011746	0.10032	0.20595	2.05287	Other	T
FBgn0037920	0.15632	0.365	2.33501	Other	T
FBgn0037922	0.06936	0.16526	2.38263	Other	T
FBgn0042205	0.1626	0.30106	1.85153	Other	T
FBgn0025709	0.07839	0.141	1.79864	Other	T
FBgn0037924	0.25785	0.40565	1.57316	Other	T
FBgn0033371	0.15347	0.36276	2.36374	Other	T
FBgn0033372	0.41895	0.58876	1.40531	Other	T
FBgn0037925	0.04185	0.04449	1.06309	Other	T
FBgn0010220	0.04019	0.08437	2.09928	Other	T
FBgn0033373	0.03462	0.06893	1.99135	Other	T
FBgn0036659	0.03887	0.06545	1.68362	Other	T
FBgn0033374	0.40886	0.67529	1.65164	Other	T
FBgn0037926	0.15217	0.25578	1.68085	Other	T
FBgn0004556	0.13705	0.24957	1.82098	Other	T
FBgn0033375	0.01555	0.03712	2.38698	Other	T
FBgn0043578	0.07026	0.12905	1.83674	Other	T
FBgn0043577	0.07286	0.1505	2.0657	Other	T
FBgn0033376	0.1283	0.24962	1.94565	Other	T
FBgn0032588	0.18428	0.29587	1.60555	Other	T
FBgn0037930	0.07117	0.12751	1.79168	Other	T
FBgn0051816	0.07321	0.18653	2.54793	Other	T
FBgn0011290	0.06266	0.08325	1.32866	Other	T
FBgn0037933	0.04337	0.12086	2.78692	Other	T
FBgn0033378	0.00702	0.01559	2.22063	Other	T
FBgn0033379	0.0157	0.04448	2.83373	Other	T
FBgn0033380	0.06891	0.14105	2.04685	Other	T
FBgn0036654	0.42573	0.57388	1.348	Other	T
FBgn0042110	0.22405	0.35437	1.58165	Other	T
FBgn0003612	0.03581	0.04462	1.24599	Other	T
FBgn0037937	0.01719	0.0337	1.96078	Other	T
FBgn0037938	0.10216	0.36842	3.60626	Other	T
FBgn0033381	0.07217	0.16516	2.28848	Other	T
FBgn0037939	0.19987	0.33935	1.69791	Other	T
FBgn0025821	0.38341	0.84528	2.20464	Other	T
FBgn0027561	0.07756	0.10753	1.38637	Other	T
FBgn0037940	0.1228	0.21581	1.75732	Other	T
FBgn0033382	0.03894	0.07082	1.81852	Other	T
FBgn0033383	0.05721	0.09176	1.60392	Other	T
FBgn0004170	0.05712	0.11561	2.02404	Other	T
FBgn0036652	0.08341	0.16586	1.98861	Other	T
FBgn0028955	0.10391	0.21836	2.10141	Other	T
FBgn0040512	0.0067	0.00685	1.02372	Other	T
FBgn0033385	0.0333	0.03408	1.0235	Other	T
FBgn0037942	0.04261	0.08955	2.10159	Other	T
FBgn0050342	0.02974	0.06853	2.30452	Other	T
FBgn0002906	0.0786	0.17582	2.23708	Other	T
FBgn0026323	0.06922	0.08533	1.23265	Other	T
FBgn0010223	0.04264	0.07181	1.68435	Other	T
FBgn0037943	0.0471	0.13265	2.81672	Other	T
FBgn0037944	0.10622	0.20494	1.92937	Other	T
FBgn0036650	0.03136	0.03288	1.04829	Other	T
FBgn0002561	0.07807	0.138	1.76759	Other	T
FBgn0017581	0.10238	0.11008	1.07513	Other	T
FBgn0032586	0.04193	0.08021	1.9128	Other	T
FBgn0033388	0.1525	0.2356	1.54489	Other	T
FBgn0037947	0.02131	0.01873	0.87889	Other	T
FBgn0033389	0.24751	0.53534	2.16287	Other	T
FBgn0003194	0.14493	0.22051	1.5215	Other	T
FBgn0000017	0.04744	0.05916	1.24708	Other	T
FBgn0037949	0.06924	0.11057	1.59691	Other	T
FBgn0037950	0.01451	0.01601	1.10296	Other	T
FBgn0025802	0.02726	0.04776	1.75196	Other	T
FBgn0051116	0.06176	0.0658	1.06535	Other	T
FBgn0005677	0.02765	0.03881	1.40377	Other	T
FBgn0017572	0.00481	0.01494	3.10596	Other	T
FBgn0040649	0.18694	0.33626	1.79872	Other	T
FBgn0025558	0.04127	0.15165	3.6743	Other	T
FBgn0004465	0.05222	0.10931	2.09317	Other	T
FBgn0033391	0.0544	0.06915	1.27127	Other	T
FBgn0002284	0.03443	0.10813	3.14085	Other	T
FBgn0036648	0.06608	0.14191	2.1476	Other	T
FBgn0037954	0.04923	0.07618	1.54735	Other	T
FBgn0031118	0.06661	0.10913	1.63833	Other	T
FBgn0019624	0.04758	0.07095	1.49102	Other	T
FBgn0037955	0.01652	0.04745	2.87244	Other	T
FBgn0037956	0.03708	0.06987	1.88439	Other	T
FBgn0015561	0.07944	0.10602	1.33464	Other	T
FBgn0033392	0.07031	0.13207	1.87834	Other	T
FBgn0002283	0.00486	0.00544	1.11943	Other	T
FBgn0036643	0.07599	0.18203	2.39542	Other	T
FBgn0033393	0.11474	0.16942	1.47654	Other	T
FBgn0036642	0.05736	0.09013	1.57133	Other	T
FBgn0028693	0.01739	0.04226	2.42998	Other	T
FBgn0036641	0.0623	0.20953	3.36313	Other	T
FBgn0020414	0.05272	0.10521	1.99546	Other	T
FBgn0036640	0.15258	0.3649	2.3916	Other	T
FBgn0020415	0.0609	0.11114	1.82495	Other	T
FBgn0000137	0.09446	0.19369	2.05055	Other	T
FBgn0026208	0.02813	0.04065	1.44502	Other	T
FBgn0020416	0.08668	0.18205	2.10021	Other	T
FBgn0026061	0.04918	0.11808	2.40094	Other	T
FBgn0003312	0.08528	0.11708	1.37286	Other	T
FBgn0036639	0.11562	0.14076	1.21753	Other	T
FBgn0037958	0.10159	0.19536	1.9231	Other	T
FBgn0037960	0.06742	0.10601	1.57227	Other	T
FBgn0051368	0.03712	0.08196	2.2079	Other	T
FBgn0037962	0.00167	0.00367	2.20053	Other	T
FBgn0010114	0.04783	0.05215	1.09023	Other	T
FBgn0036638	0.16602	0.22391	1.34873	Other	T
FBgn0029525	0.1448	0.26802	1.85096	Other	T
FBgn0028523	0.03616	0.12293	3.39973	Other	T
FBgn0023536	0.05986	0.10649	1.77892	Other	T
FBgn0023537	0.01494	0.02206	1.47634	Other	T
FBgn0031115	0.05952	0.12607	2.11814	Other	T
FBgn0023177	0.00395	0.00811	2.05041	Other	T
FBgn0004648	0.05029	0.12424	2.47061	Other	T
FBgn0011280	0.1233	0.25533	2.07082	Other	T
FBgn0031111	0.13442	0.25512	1.89798	Other	T
FBgn0020621	0.04953	0.06402	1.29239	Other	T
FBgn0031109	0.09933	0.17039	1.71542	Other	T
FBgn0051211	0.19076	0.23683	1.24148	Other	T
FBgn0040651	0.08999	0.15202	1.68941	Other	T
FBgn0031108	0.18802	0.32981	1.75413	Other	T
FBgn0003515	0.01999	0.0311	1.5553	Other	T
FBgn0037967	0.1787	0.41099	2.2999	Other	T
FBgn0000147	0.05535	0.10571	1.90976	Other	T
FBgn0037968	0.05514	0.11174	2.02629	Other	T
FBgn0037969	0.02985	0.05024	1.68288	Other	T
FBgn0023535	0.03051	0.04347	1.42492	Other	T
FBgn0037970	0.09053	0.19451	2.14854	Other	T
FBgn0000570	0.01282	0.02115	1.65027	Other	T
FBgn0037971	0.08816	0.159	1.8035	Other	T
FBgn0033400	0.03895	0.0973	2.49803	Other	T
FBgn0037972	0.05621	0.05757	1.02416	Other	T
FBgn0026326	0.09547	0.19046	1.99489	Other	T
FBgn0004569	0.06877	0.095	1.3813	Other	T
FBgn0024211	0.04664	0.06519	1.39753	Other	T
FBgn0024983	0.05894	0.11528	1.95588	Other	T
FBgn0028408	0.02187	0.01619	0.74042	Other	T
FBgn0031106	0.01469	0.03524	2.39888	Other	T
FBgn0027334	0.01712	0.04542	2.65355	Other	T
FBgn0037976	0.11137	0.21041	1.8893	Other	T
FBgn0037977	0.07189	0.13292	1.849	Other	T
FBgn0033402	0.06293	0.10293	1.63549	Other	T
FBgn0037978	0.01888	0.02944	1.55934	Other	T
FBgn0053158	0.03116	0.05741	1.84231	Other	T
FBgn0037979	0.09604	0.18998	1.97803	Other	T
FBgn0028841	0.0777	0.15072	1.93966	Other	T
FBgn0037980	0.00488	0.01063	2.17699	Other	T
FBgn0037981	0.02272	0.06035	2.65607	Other	T
FBgn0051358	0.20411	0.37284	1.82669	Other	T
FBgn0037985	0.15997	0.37768	2.36089	Other	T
FBgn0025678	0.03945	0.06312	1.60003	Other	T
FBgn0052159	0.06555	0.08264	1.26078	Other	T
FBgn0028506	0.08801	0.13199	1.49968	Other	T
FBgn0037986	0.18828	0.29675	1.5761	Other	T
FBgn0000108	0.04116	0.06342	1.54088	Other	T
FBgn0000307	0.08408	0.13711	1.63067	Other	T
FBgn0051818	0.18533	0.42401	2.28789	Other	T
FBgn0037989	0.06207	0.08574	1.38138	Other	T
FBgn0014163	0.04185	0.0551	1.3165	Other	T
FBgn0033404	0.14944	0.24231	1.62149	Other	T
FBgn0001995	0.07902	0.12295	1.55586	Other	T
FBgn0014092	0.11498	0.22006	1.91397	Other	T
FBgn0036627	0.03745	0.07276	1.94295	Other	T
FBgn0036624	0.42624	0.64214	1.50652	Other	T
FBgn0051361	0.24236	0.17697	0.73018	Other	T
FBgn0000250	0.1142	0.10077	0.88239	Other	T
FBgn0036621	0.06351	0.08988	1.41516	Other	T
FBgn0001086	0.02344	0.04509	1.9239	Other	T
FBgn0033405	0.09381	0.13407	1.42907	Other	T
FBgn0000339	0.01174	0.01248	1.06309	Other	T
FBgn0037992	0.02729	0.02722	0.99716	Other	T
FBgn0011708	0.05613	0.09084	1.61854	Other	T
FBgn0036619	0.13274	0.20451	1.54063	Other	T
FBgn0015338	0.01969	0.02762	1.40278	Other	T
FBgn0028525	0.29031	0.58398	2.0116	Other	T
FBgn0028894	0.01585	0.03139	1.98027	Other	T
FBgn0028895	0.01277	0.02818	2.20728	Other	T
FBgn0011693	0.01722	0.0263	1.52711	Other	T
FBgn0036615	0.03226	0.06023	1.86693	Other	T
FBgn0028375	0.05916	0.06988	1.18119	Other	T
FBgn0037993	0.28458	0.1849	0.64975	Other	T
FBgn0036614	0.07499	0.15379	2.05088	Other	T
FBgn0036613	0.06805	0.13017	1.91282	Other	T
FBgn0001992	0.03812	0.06751	1.7708	Other	T
FBgn0032582	0.08214	0.15316	1.86463	Other	T
FBgn0036612	0.05058	0.05803	1.14736	Other	T
FBgn0033408	0.01088	0.01688	1.55136	Other	T
FBgn0028473	0.0224	0.03406	1.52029	Other	T
FBgn0040079	0.08157	0.13072	1.60241	Other	T
FBgn0010218	0.63153	0.87606	1.3872	Other	T
FBgn0025633	0.03983	0.05706	1.43275	Other	T
FBgn0016970	0.20214	0.3357	1.66071	Other	T
FBgn0029529	0.04485	0.09984	2.22616	Other	T
FBgn0016038	0.08285	0.15638	1.88753	Other	T
FBgn0016078	0.1173	0.12754	1.08733	Other	T
FBgn0025640	0.10281	0.19334	1.88063	Other	T
FBgn0025635	0.04441	0.10632	2.39416	Other	T
FBgn0001994	0.05077	0.0671	1.32163	Other	T
FBgn0002579	0.0093	0.01716	1.84494	Other	T
FBgn0041087	0.11125	0.17407	1.56474	Other	T
FBgn0001341	0.12808	0.2848	2.22364	Other	T
FBgn0037995	0.05508	0.13302	2.41497	Other	T
FBgn0020381	0.16036	0.32976	2.0564	Other	T
FBgn0036602	0.04746	0.03903	0.82228	Other	T
FBgn0033412	0.09531	0.20181	2.11739	Other	T
FBgn0033413	0.05751	0.08628	1.50015	Other	T
FBgn0036599	0.08962	0.08304	0.92657	Other	T
FBgn0028897	0.03247	0.06279	1.93399	Other	T
FBgn0037998	0.07114	0.14127	1.98578	Other	T
FBgn0017558	0.01419	0.01863	1.31285	Other	T
FBgn0002673	0.11126	0.23027	2.0696	Other	T
FBgn0037999	0.04929	0.09563	1.94014	Other	T
FBgn0038000	0.12871	0.25669	1.9943	Other	T
FBgn0028515	0.08407	0.22872	2.72048	Other	T
FBgn0038001	0.08609	0.16561	1.92362	Other	T
FBgn0038002	0.04729	0.09013	1.90598	Other	T
FBgn0025634	0.12888	0.25297	1.96278	Other	T
FBgn0038003	0.07622	0.1389	1.82242	Other	T
FBgn0029092	0.06376	0.07826	1.22745	Other	T
FBgn0024734	0.01227	0.00801	0.6534	Other	T
FBgn0025639	0.08604	0.12696	1.47561	Other	T
FBgn0025637	0.00746	0.02128	2.85355	Other	T
FBgn0033415	0.14841	0.20204	1.3614	Other	T
FBgn0038008	0.14723	0.29787	2.02321	Other	T
FBgn0036587	0.06833	0.14236	2.08359	Other	T
FBgn0033416	0.09239	0.06987	0.75626	Other	T
FBgn0036583	0.07824	0.10269	1.3125	Other	T
FBgn0003651	0.03092	0.03556	1.15003	Other	T
FBgn0031098	0.03971	0.13777	3.46942	Other	T
FBgn0022770	0.01383	0.01987	1.43628	Other	T
FBgn0036580	0.01258	0.0192	1.52605	Other	T
FBgn0036578	0.12362	0.19657	1.59013	Other	T
FBgn0038011	0.45325	0.84812	1.87121	Other	T
FBgn0004360	0.04749	0.04641	0.97718	Other	T
FBgn0038013	0.09458	0.19523	2.06409	Other	T
FBgn0038014	0.20238	0.4229	2.08964	Other	T
FBgn0038016	0.11216	0.1996	1.77962	Other	T
FBgn0033418	0.01459	0.0132	0.90477	Other	T
FBgn0038017	0.01756	0.0261	1.48625	Other	T
FBgn0038020	0.06194	0.11875	1.91725	Other	T
FBgn0001149	0.03147	0.03316	1.05365	Other	T
FBgn0010043	0.13723	0.22988	1.67514	Other	T
FBgn0038028	0.13802	0.25523	1.84917	Other	T
FBgn0038029	0.03628	0.05018	1.38295	Other	T
FBgn0050336	0.00162	0.00276	1.70156	Other	T
FBgn0038030	0.20265	0.25261	1.24651	Other	T
FBgn0000084	0.02726	0.05763	2.11427	Other	T
FBgn0038035	0.11627	0.21127	1.81704	Other	T
FBgn0038037	0.06619	0.12546	1.89536	Other	T
FBgn0000455	0.03904	0.09736	2.49424	Other	T
FBgn0031090	0.03093	0.03984	1.28814	Other	T
FBgn0038042	0.0276	0.08917	3.23101	Other	T
FBgn0038043	0.10807	0.16398	1.51732	Other	T
FBgn0038045	0.15299	0.26127	1.70777	Other	T
FBgn0036575	0.11371	0.20828	1.83161	Other	T
FBgn0038046	0.01363	0.03171	2.32594	Other	T
FBgn0010405	0.02356	0.0305	1.29442	Other	T
FBgn0029512	0.07692	0.17966	2.33558	Other	T
FBgn0038049	0.03097	0.07405	2.39131	Other	T
FBgn0038051	0.4217	0.81041	1.92177	Other	T
FBgn0003076	0.02682	0.0383	1.42778	Other	T
FBgn0033422	0.07398	0.12479	1.6868	Other	T
FBgn0029532	0.10779	0.27507	2.55193	Other	T
FBgn0043044	0.04807	0.06152	1.27993	Other	T
FBgn0038052	0.57082	0.71839	1.25853	Other	T
FBgn0040383	0.03697	0.07555	2.04357	Other	T
FBgn0038053	0.01856	0.02444	1.31709	Other	T
FBgn0010280	0.05547	0.06657	1.20022	Other	T
FBgn0038055	0.07367	0.15971	2.16796	Other	T
FBgn0040382	0.10909	0.14005	1.28385	Other	T
FBgn0033424	0.0269	0.04652	1.72916	Other	T
FBgn0038056	0.10574	0.18693	1.76778	Other	T
FBgn0038057	0.03537	0.07659	2.16541	Other	T
FBgn0017453	0.03967	0.06598	1.66312	Other	T
FBgn0038058	0.02398	0.04931	2.05665	Other	T
FBgn0031088	0.20101	0.29573	1.47127	Other	T
FBgn0028884	0.24698	0.49782	2.01563	Other	T
FBgn0033425	0.14441	0.13615	0.94286	Other	T
FBgn0033426	0.04146	0.055	1.32664	Other	T
FBgn0033427	0.19617	0.36489	1.86007	Other	T
FBgn0033428	0.01165	0.03699	3.17539	Other	T
FBgn0036566	0.01645	0.02122	1.29042	Other	T
FBgn0033429	0.06896	0.13735	1.99154	Other	T
FBgn0025286	0.00477	0.00635	1.33315	Other	T
FBgn0033432	0.27261	0.43264	1.58702	Other	T
FBgn0033431	0.0766	0.14761	1.92692	Other	T
FBgn0027343	0.04477	0.09439	2.10846	Other	T
FBgn0036564	0.02233	0.03449	1.54466	Other	T
FBgn0010342	0.05661	0.12314	2.17506	Other	T
FBgn0050338	0.09303	0.1955	2.10144	Other	T
FBgn0033434	0.08909	0.15146	1.69997	Other	T
FBgn0050340	0.08881	0.14654	1.64996	Other	T
FBgn0025618	0.06185	0.1148	1.85618	Other	T
FBgn0050339	0.1148	0.15406	1.34199	Other	T
FBgn0025620	0.01961	0.04363	2.22419	Other	T
FBgn0005536	0.08293	0.0755	0.91037	Other	T
FBgn0033437	0.05682	0.08257	1.45325	Other	T
FBgn0028374	0.18358	0.12381	0.67444	Other	T
FBgn0015799	0.09617	0.16747	1.74148	Other	T
FBgn0028520	0.11593	0.23517	2.02847	Other	T
FBgn0025617	0.01979	0.03345	1.69005	Other	T
FBgn0033438	0.22215	0.28401	1.27847	Other	T
FBgn0036558	0.02332	0.04024	1.7257	Other	T
FBgn0036557	0.07264	0.14686	2.02179	Other	T
FBgn0013433	0.15046	0.13795	0.91688	Other	T
FBgn0036556	0.05089	0.02689	0.5284	Other	T
FBgn0005671	0.00143	0.00086	0.59713	Other	T
FBgn0000115	0.00459	0.0046	1.00204	Other	T
FBgn0038065	0.0001	0.00013	1.30655	Other	T
FBgn0029535	0.33534	0.54202	1.61632	Other	T
FBgn0028495	0.04857	0.09376	1.93027	Other	T
FBgn0031085	0.19309	0.33861	1.75357	Other	T
FBgn0000182	0.03997	0.04728	1.18276	Other	T
FBgn0038070	0.02114	0.03665	1.73426	Other	T
FBgn0038071	0.27191	0.39264	1.44398	Other	T
FBgn0036546	0.00878	0.00984	1.12013	Other	T
FBgn0023143	0.04864	0.08043	1.65358	Other	T
FBgn0036545	0.02198	0.05589	2.54309	Other	T
FBgn0038073	0.04632	0.07518	1.62319	Other	T
FBgn0038074	0.02638	0.03621	1.37246	Other	T
FBgn0026207	0.11034	0.19054	1.7268	Other	T
FBgn0038076	0.0512	0.0966	1.88689	Other	T
FBgn0001296	0.04936	0.06964	1.41083	Other	T
FBgn0028644	0.15957	0.10426	0.6534	Other	T
FBgn0005355	0.02824	0.09945	3.52134	Other	T
FBgn0011745	0.01246	0.01289	1.0349	Other	T
FBgn0038078	0.05	0.29777	5.9559	Other	T
FBgn0038079	0.02444	0.03178	1.30017	Other	T
FBgn0016693	0.00572	0.01131	1.97823	Other	T
FBgn0010316	0.08793	0.1136	1.29194	Other	T
FBgn0038080	0.06747	0.13338	1.9769	Other	T
FBgn0051820	0.00632	0.03844	6.08462	Other	T
FBgn0036544	0.01246	0.00975	0.78224	Other	T
FBgn0033441	0.03993	0.04442	1.11257	Other	T
FBgn0031082	0.12156	0.3221	2.64973	Other	T
FBgn0038084	0.11087	0.10997	0.99186	Other	T
FBgn0028858	0.04116	0.12389	3.01007	Other	T
FBgn0033442	0.12329	0.23565	1.91127	Other	T
FBgn0051736	0.8431	0.45359	0.53801	Other	T
FBgn0040344	0.03474	0.06138	1.7667	Other	T
FBgn0040339	0.0019	0.0175	9.19498	Other	T
FBgn0051345	0.05846	0.094	1.60794	Other	T
FBgn0031081	0.01423	0.03729	2.62081	Other	T
FBgn0040346	0.07342	0.1603	2.18351	Other	T
FBgn0027589	0.12816	0.14477	1.12964	Other	T
FBgn0031080	0.25022	0.29027	1.16005	Other	T
FBgn0040347	0.07526	0.17627	2.34226	Other	T
FBgn0040348	0.06479	0.11026	1.70177	Other	T
FBgn0036534	0.14809	0.16787	1.13359	Other	T
FBgn0040349	0.02479	0.04277	1.72548	Other	T
FBgn0015025	0.33685	0.62904	1.86743	Other	T
FBgn0038087	0.05243	0.08165	1.55745	Other	T
FBgn0040350	0.08092	0.16349	2.02032	Other	T
FBgn0038088	0.05458	0.09289	1.70174	Other	T
FBgn0033446	0.02565	0.03708	1.44538	Other	T
FBgn0040093	0.18758	0.39429	2.10204	Other	T
FBgn0054033	0.24842	0.67997	2.73716	Other	T
FBgn0050001	0.18299	0.34551	1.8881	Other	T
FBgn0038089	0.06822	0.13495	1.97803	Other	T
FBgn0032577	0.33502	0.33397	0.99688	Other	T
FBgn0033447	0.04353	0.09952	2.28654	Other	T
FBgn0038090	0.28151	0.39169	1.39136	Other	T
FBgn0033450	0.17256	0.35864	2.07836	Other	T
FBgn0033451	0.07284	0.14765	2.02719	Other	T
FBgn0033452	0.02681	0.05233	1.95147	Other	T
FBgn0038092	0.07203	0.08568	1.18962	Other	T
FBgn0023180	0.09562	0.22798	2.3842	Other	T
FBgn0023175	0.0443	0.1014	2.28878	Other	T
FBgn0051735	0.26245	0.58369	2.22399	Other	T
FBgn0033454	0.0419	0.09935	2.37135	Other	T
FBgn0040493	0.0665	0.11073	1.66511	Other	T
FBgn0050010	0.06974	0.13531	1.94011	Other	T
FBgn0040494	0.25566	0.50139	1.96119	Other	T
FBgn0010105	0.11183	0.09469	0.84673	Other	T
FBgn0033457	0.08661	0.20277	2.34124	Other	T
FBgn0038095	0.07311	0.13784	1.88548	Other	T
FBgn0011241	0.0565	0.10877	1.92508	Other	T
FBgn0038098	0.09475	0.1214	1.28129	Other	T
FBgn0029552	0.20335	0.45361	2.23067	Other	T
FBgn0033458	0.52075	0.62682	1.20368	Other	T
FBgn0038099	0.13169	0.28926	2.19657	Other	T
FBgn0038100	0.02581	0.02357	0.913	Other	T
FBgn0033460	0.02618	0.05044	1.92695	Other	T
FBgn0038102	0.22677	0.47635	2.10057	Other	T
FBgn0051342	0.0996	0.13996	1.40526	Other	T
FBgn0040351	0.08502	0.15502	1.82337	Other	T
FBgn0038106	0.05015	0.14945	2.98042	Other	T
FBgn0050008	0.14889	0.37247	2.50166	Other	T
FBgn0040337	0.07835	0.14691	1.875	Other	T
FBgn0038110	0.04427	0.06035	1.36341	Other	T
FBgn0026143	0.02061	0.05119	2.48372	Other	T
FBgn0038109	0.09612	0.20148	2.09618	Other	T
FBgn0053082	0.28931	0.41988	1.45131	Other	T
FBgn0014903	0.07987	0.18104	2.26674	Other	T
FBgn0020496	0.01919	0.01106	0.57646	Other	T
FBgn0028903	0.03378	0.08246	2.44114	Other	T
FBgn0036528	0.234	0.40736	1.74086	Other	T
FBgn0033464	0.01565	0.03195	2.04096	Other	T
FBgn0031077	0.10741	0.26703	2.48615	Other	T
FBgn0038111	0.05223	0.07877	1.5081	Other	T
FBgn0002354	0.0414	0.06949	1.67829	Other	T
FBgn0003638	0.0772	0.13077	1.69391	Other	T
FBgn0003308	0.03248	0.06099	1.87784	Other	T
FBgn0000715	0.05977	0.17669	2.95621	Other	T
FBgn0033465	0.02364	0.04897	2.07185	Other	T
FBgn0051157	0.17607	0.36993	2.101	Other	T
FBgn0027049	0.02218	0.04109	1.85222	Other	T
FBgn0040398	0.11479	0.28217	2.45812	Other	T
FBgn0004666	0.03633	0.03754	1.03324	Other	T
FBgn0031079	0.04377	0.0852	1.94658	Other	T
FBgn0011656	0.04593	0.0402	0.87522	Other	T
FBgn0036522	0.17939	0.27761	1.54749	Other	T
FBgn0036520	0.0354	0.06461	1.8249	Other	T
FBgn0033467	0.05258	0.13688	2.60342	Other	T
FBgn0038118	0.10464	0.10745	1.02694	Other	T
FBgn0033466	0.09582	0.16262	1.6971	Other	T
FBgn0033468	0.04684	0.10985	2.34514	Other	T
FBgn0027619	0.03534	0.0931	2.63421	Other	T
FBgn0033471	0.07202	0.22924	3.1832	Other	T
FBgn0036515	0.05418	0.06471	1.19438	Other	T
FBgn0036513	0.02777	0.06287	2.26428	Other	T
FBgn0036512	0.05794	0.10022	1.72974	Other	T
FBgn0036510	0.02043	0.04635	2.26825	Other	T
FBgn0036509	0.06551	0.14714	2.24611	Other	T
FBgn0051826	0.03323	0.09294	2.7965	Other	T
FBgn0024923	0.00791	0.00898	1.1344	Other	T
FBgn0038122	0.03631	0.08502	2.34167	Other	T
FBgn0041627	0.11412	0.27304	2.39259	Other	T
FBgn0038123	0.36559	0.73353	2.00644	Other	T
FBgn0038124	0.24129	0.39278	1.62783	Other	T
FBgn0038125	0.40938	0.61155	1.49384	Other	T
FBgn0028507	0.00521	0.01014	1.94499	Other	T
FBgn0004396	0.08475	0.07392	0.87225	Other	T
FBgn0001987	0.02084	0.03781	1.81456	Other	T
FBgn0038126	0.10412	0.09939	0.95456	Other	T
FBgn0022382	0.02686	0.01946	0.72443	Other	T
FBgn0001986	0.03945	0.0774	1.96222	Other	T
FBgn0038127	0.16792	0.29381	1.74965	Other	T
FBgn0001989	0.04706	0.06587	1.39979	Other	T
FBgn0036504	0.10364	0.19296	1.86187	Other	T
FBgn0031070	0.12199	0.22848	1.8729	Other	T
FBgn0000024	0.02857	0.03173	1.11094	Other	T
[truncated: 6,523 more rows]
