# Supplementary material for: Expansion and loss of sperm nuclear basic protein genes in Drosophila correspond with genetic conflicts between sex chromosomes
Source: eLife. 2023 Feb 10;12:e85249. doi: 10.7554/eLife.85249 (PMC9917458; doi:10.7554/eLife.85249)
Supplement: Supplementary file 6. — We aligned 9–17 unambiguous orthologs from species in the D. melanogaster group to test whether a subset of sites evolves under positive selection. We compared NSsites models M1a to M2a, and M7 or M8a to M8 using likelihood ratio tests. We ran each model using several codon parameter choices (CodonFreq = 0, 2, 3) to check whether the results were robust. For example, CG30056 shows a signal of difference selection strength across sites using CodonFreq = 2 (p=0.0003), but not CodonFreq = 0 or 3 (p=1 and 0.16, respectively). [file elife-85249-supp6.xlsx]

## Sheet: Sheet1
Supplementary file 6. No evidence for positive selection on SNBP genes using site model in PAML in D. melanogaster subgroup species.
Gene	Length.MelProt	Length.PAML	# of used species	Mel.Chr	CodonFreq	P.M3M0	P.M1aM2a	P.M7M8	P.M8a	M0.likelihood	M1a.likelihood	M2a.likelihood	M3.likelihood	M7.likelihood	M8.likelihood	M8a.likelihood
CG14835	429	357	13	3L	3	1.2856e-28	0.929638	0.331083	0.157293	-3048.62	-2999.55	-2999.48	-2980.16	-2981.8	-2980.69	-2981.69
CG14835	429	357	13	3L	2	9.48703e-28	1	0.699195	0.438778	-3080.48	-3032.91	-3032.91	-3014.04	-3015.95	-3015.6	-3015.9
CG14835	429	357	13	3L	0	1.93203e-25	1	0.745478	0.433663	-3100.28	-3053.12	-3053.12	-3039.25	-3040.99	-3040.7	-3041.01
CG30056	426	393	17	2R	3	2.66888e-21	1	1	1	-2403.77	-2358.2	-2358.2	-2352.44	-2360.69	-2360.7	-2352.78
CG30056	426	393	17	2R	2	1.99917e-21	1	0.00038718	0.678604	-2420.52	-2375.53	-2375.53	-2368.89	-2376.5	-2368.64	-2368.73
CG30056	426	393	17	2R	0	2.76176e-17	1	0.158285	1	-2425.92	-2390.4	-2390.4	-2384.04	-2387	-2385.15	-2385.14
CG30356	585	414	16	2R	3	1.4627e-22	1	0.616637	0.312776	-3904.9	-3862.66	-3862.66	-3850.61	-3851.2	-3850.71	-3851.22
CG30356	585	414	16	2R	2	4.87769e-23	1	0.659877	0.335475	-3914.28	-3872.67	-3872.67	-3858.87	-3859.45	-3859.03	-3859.49
CG30356	585	414	16	2R	0	9.33104e-20	1	0.450956	0.197678	-3916.28	-3876.08	-3876.08	-3868.58	-3865.18	-3864.38	-3865.21
CG31010	1224	591	17	3R	3	2.09952e-79	0.147353	0.136798	0.0929541	-6127.3	-5963.02	-5961.1	-5940.91	-5940.41	-5938.42	-5939.83
CG31010	1224	591	17	3R	2	3.38919e-80	0.0826599	0.0607524	0.0580757	-6185.89	-6019.85	-6017.35	-5997.66	-5998.04	-5995.24	-5997.04
CG31010	1224	591	17	3R	0	2.24439e-79	0.13754	0.130803	0.130456	-6196.46	-6031.33	-6029.34	-6010.13	-6011.21	-6009.18	-6010.32
CG34269	720	492	14	3L	3	5.67e-30	1	1	1	-3827.62	-3781.47	-3781.47	-3755.99	-3757.71	-3757.71	-3757.7
CG34269	720	492	14	3L	2	6.1602e-31	1	1	1	-3868.33	-3818.05	-3818.05	-3794.45	-3796.2	-3796.2	-3796.19
CG34269	720	492	14	3L	0	1.10826e-28	1	1	1	-3862.25	-3814.98	-3814.98	-3793.64	-3795.63	-3795.63	-3795.6
CG42355	594	372	13	3L	3	2.70856e-22	1	0.185906	0.279643	-3220.27	-3179.77	-3179.77	-3166.61	-3170.26	-3168.58	-3169.16
CG42355	594	372	13	3L	2	5.30006e-22	1	0.29643	0.479398	-3246.72	-3202.74	-3202.74	-3193.75	-3194.74	-3193.52	-3193.77
CG42355	594	372	13	3L	0	7.23782e-16	1	1	0.693979	-3227.66	-3197.69	-3197.69	-3189.12	-3190.24	-3190.24	-3190.32
ddbt	324	306	17	3L	3	1.15291e-23	0.893097	0.357933	1	-2756.58	-2719.03	-2718.92	-2699.71	-2701.86	-2700.83	-2690.32
ddbt	324	306	17	3L	2	6.41064e-31	1	0.357933	0.159842	-2773.55	-2719.03	-2719.03	-2699.71	-2701.86	-2700.83	-2701.82
ddbt	324	306	17	3L	0	1.786e-21	1	0.983817	0.818854	-2726.12	-2689.76	-2689.76	-2674.38	-2672.17	-2672.16	-2672.18
Mst33A	1287	894	9	2L	3	5.42021e-16	1	0.960664	0.764821	-5118.17	-5084.63	-5084.63	-5079.34	-5080.4	-5080.36	-5080.4
Mst33A	1287	894	9	2L	2	5.33198e-15	1	1	0.763041	-5172.21	-5141.57	-5141.57	-5135.72	-5136.65	-5136.65	-5136.69
Mst33A	1287	894	9	2L	0	4.78001e-14	1	1	0.793616	-5203.96	-5173.29	-5173.29	-5169.72	-5168.79	-5168.79	-5168.83
Mst77F	993	375	15	3L	3	6.2216e-34	0.102272	0.0519647	0.0188552	-3910.62	-3849.85	-3847.57	-3829.76	-3833.01	-3830.05	-3832.81
Mst77F	993	375	15	3L	2	1.86952e-37	1	0.209602	0.124409	-3980.13	-3912.2	-3912.2	-3891.06	-3892.73	-3891.17	-3892.35
Mst77F	993	375	15	3L	0	1.5292e-31	1	0.908728	0.582463	-3982.16	-3921.08	-3921.08	-3906.87	-3907.48	-3907.39	-3907.54
Prot	783	330	14	2L	3	4.90677e-45	1	0.0033572	0.772787	-3044.23	-2948.99	-2948.99	-2937.52	-2951.12	-2945.43	-2945.47
Prot	783	330	14	2L	2	1.63934e-40	1	0.0692772	0.485607	-3099.37	-3021.95	-3021.95	-3003.19	-3011.05	-3008.38	-3008.62
Prot	783	330	14	2L	0	1.46678e-39	1	0.049112	1	-3124.7	-3043.8	-3043.8	-3030.73	-3039	-3035.99	-3035.94
Prtl99C	1290	537	16	3R	3	8.40346e-54	1	0.083306	0.359812	-5257.9	-5149.8	-5149.8	-5130.84	-5133.36	-5130.88	-5131.3
Prtl99C	1290	537	16	3R	2	4.30996e-52	1	0.0743368	0.406207	-5287.76	-5181.52	-5181.52	-5164.66	-5166.97	-5164.37	-5164.72
Prtl99C	1290	537	16	3R	0	4.46711e-50	1	0.180287	0.321681	-5295.25	-5193.71	-5193.71	-5176.84	-5179.13	-5177.42	-5177.91
tHMG	618	348	11	3R	3	4.07444e-17	0.929898	0.740646	0.39447	-2625.27	-2596.16	-2596.09	-2583.78	-2586.55	-2586.25	-2586.62
tHMG	618	348	11	3R	2	2.14468e-18	1	0.600199	0.288316	-2650.25	-2618.72	-2618.72	-2605.75	-2609.19	-2608.68	-2609.25
tHMG	618	348	11	3R	0	2.35508e-15	1	1	0.861271	-2647.52	-2618.11	-2618.11	-2610.19	-2612.12	-2612.12	-2612.14
Tpl94D	642	396	13	3R	3	5.04638e-19	1	0.588948	0.90099	-3705.06	-3667.03	-3667.03	-3659.07	-3660.21	-3659.68	-3659.69
Tpl94D	642	396	13	3R	2	5.32228e-21	1	0.697296	0.62169	-3739.9	-3698.39	-3698.39	-3689.28	-3689.57	-3689.21	-3689.33
Tpl94D	642	396	13	3R	0	7.29508e-21	1	0.919151	1	-3747.82	-3704.94	-3704.94	-3697.52	-3698.28	-3698.2	-3698.11
