# Supplementary material for: Expansion and loss of sperm nuclear basic protein genes in Drosophila correspond with genetic conflicts between sex chromosomes
Source: eLife. 2023 Feb 10;12:e85249. doi: 10.7554/eLife.85249 (PMC9917458; doi:10.7554/eLife.85249)
Supplement: Supplementary file 7. — We extracted population data using an available dataset of >1000 D. melanogaster strains (Hervas et al., 2017; Lack et al., 2016) and long-read assemblies, and documented inactivating mutations in SNBP genes. We found that loss-of-function variants of SNBP genes segregate at very low frequencies (<1%) among D. melanogaster strains. The only exceptions are CG14835 (1.5% frequency of frameshift mutation in worldwide populations), tHMG1 (5.4% frequency of deletion based on long-read assemblies), and ddbt (1.2% frequency of loss of start codon in non-African populations). However, the ddbt mutation is likely to be benign owing to an alternate start codon just a few codons downstream of the canonical start site. In contrast, variants that are not likely to impair function (small in-frame indels) can segregate at higher frequency, e.g., a 15 bp insertion variant of tHMG2 is present at 70% frequency in worldwide D. melanogaster populations. This suggests nearly strict retention of all SNBP genes, whether they were shown to be essential for male fertility in laboratory experiments or not, in all sequenced strains of D. melanogaster. [file elife-85249-supp7.xlsx]

## Sheet: Sheet1
Supplementary file 7. Low frequency of inactivating polymorphisms in SNBP genes from D. melanogaster populations.
Number	Gene	Position	Reference	Mutation	Effect	Frequence(%)	Population
1	CG14835	3L:7429986	G	GT	frameshift	1.53568	Worldwide
2	CG14835	3L:7429993	C	CT	frameshift	0.0903342	ZW177 only
3	CG14835	3L:7430020	CACCTGGTAC	C	in-frame del	0.0903342	CO16-3 only
4	CG14835	3L:7430132	ACTGAACATCAGAGCGCGT	A	in-frame del	0.542005	African
5	CG14835	3L:7430133	CTGAACATCAGAGCGCGTC	C	in-frame del	0.180668	SD124N and SD127N only
6	CG30356	3L:4616805	AGTT	A	in-frame del	0.451671	FR
7	CG30356	3L:4616868	CGTT	C	in-frame del	0.722674	Worldwide
8	CG30356	3L:4616872	G	GTTTTGC	in-frame ins	0.0903342	FR310 only
9	CG31010	3R:26531412	CTTCATTCAT	C	in-frame del	0.361337	African
10	CG31010	3R:26531422	T	TGTCGACGAGTGAA	frameshift	0.0903342	EF80N only
11	CG31010	3R:26531426	TTCATTTCAT	T	in-frame del	0.0903342	ZI136 only
12	CG31010	3R:26531435	T	TTCATTTCAT	in-frame del	0.0903342	ZI394N only
13	CG34269	3L:528432	G	GAATGCGATTTTTTCT	in-frame ins	0.0903342	ZI264 only
14	CG34269	3L:528433	GA	G	frameshift	0.0903342	ZI104 only
15	CG34269	3L:528443	TGGCGA	T	frameshift	0.0903342	GH15 only
16	CG34269	3L:528479	AG	A	frameshift	0.0903342	SP335N only
17	CG34269	3L:528618	C	CGAAACACG	frameshift	0.180668	ZI235 and ZI269 only
18	CG34269	3L:528619	T	TAAACAC	in-frame ins	0.0903342	ZI269 only
19	CG34269	3L:528725	CAGG	C	in-frame del	0.180668	ZI324 and ZI379 only
20	CG34269	3L:528727	GGAG	G	in-frame del	0.0903342	ZI351 only
21	CG34269	3L:528761	C	T	premature stop codon	0.0903342	RAL-239 only
22	CG34269	3L:528932	CCA	C	frameshift	0.0903342	ZI379 only
23	CG34269	3L:528963	CGAAATATAGATCAACTTGCTTATATCCCT	C	frameshift	0.0903342	I33 only
24	ddbt	3L:317208	AT	A	lose start codon	1.26468	nonAfrican
25	ddbt	3L:317559	TG	T	frameshift and extend ccoding region	0.0903342	SD94N only
26	Mst33A	2L:11586011	ATCT	A	in-frame del	0.813008	Worldwide
27	Mst33A	2L:11586016	CTTC	C	in-frame del	0.180668	RAL-584 and RAL-627 only
28	Mst77F	3L:20810280	ACTTGGGCTTGGAGCT	A	in-frame del	0.180668	RAL-227 and RAL-822 only
29	Mst77F	3L:20810389	GGGCTTC	G	in-frame del	0.271003	SD14N, SD43N, and SD44N only
30	ProtA	2L:14879394	GCACTTCTGCCTCGGTGCA	G	in-frame del	0.0903342	SP103N only
31	tHMG-1	3R:18317873	GTGGAAT	G	in-frame del	0.0903342	CO15N only
32	tHMG-1	3R:18317977	CGAT	C	in-frame del	0.542005	European and African
33	tHMG-1				tandem duplication	1.78	ES_Tom_15_8 only, long read assemblies
34	tHMG-1				Deletion	5.36	Worldwide, long read assemblies
35	tHMG-2	3R:18318992	AC	A	in-frame, together with 34	0.271003	African
36	tHMG-2	3R:18318995	A	AG	in-frame, together with 33	0.271003	African
37	tHMG-2	3R:18319003	CG	C	frameshift	0.0903342	43_18 only
38	tHMG-2	3R:18319157	GG	G	frameshift	0.0903342	ZI213 only
39	tHMG-2	3R:18319189	TACAAGGAGAAGTTGGAGAAGTGGAATGCCTTCAAGGAGCACCAGACGGAGTCGTTTCCCCATATCTATGA	T	frameshift	0.0903342	FR263N only
40	tHMG-2	3R:18319194	GGAG	G	in-frame del	0.0903342	CO16-3 only
41	tHMG-2	3R:18319200	GTTG	G	in-frame, together with 40	0.451671	Worldwide
42	tHMG-2	3R:18319204	G	GTGC	in-frame, together with 39	0.451671	Worldwide
43	tHMG-2	3R:18319227	G	GGTCTGCCTTT	in-frame, together with 42	0.180668	ZI232 and ZI466 only
44	tHMG-2	3R:18319230	CCAGACGG	C	in-frame, together with 41	0.180668	ZI232 and ZI466 only
45	tHMG-2	3R:18319237	G	GTGGTCTGCCTTTCAC	in-frame ins	69.8284	Worldwide
46	tHMG-2	3R:18319239	G	GGTCTGCCTTTCGCAG	in-frame ins	2.8907	Worldwide
47	tHMG-2	3R:18319190	A	AGCTC	frameshift, together with 46, 47	0.0903342	FR158N only
48	tHMG-2	3R:18319250	A	AGCAAGGCAATGGCCGAG	frameshift, together with 38, 47	0.0903342	FR158N only
49	tHMG-2	3R:18319252	ATCTATGAA	A	frameshift, together with 38, 46	0.0903342	FR158N only
50	tHMG-2	3R:18319282	TCAAAAACT	T	frameshift	0.0903342	UG17-3 only
51	tHMG-2	3R:18319373	A	AATTAAATATTTAAA	frameshift	0.0903342	GU11-3 only
52	tHMG-2	3R:18792469	GGTCTGCTTATAA	G	in-frame del	0.0903342	GH08 only
53	Tpl94D	3R:18792263	G	GAATTCCAGGTC	frameshift	0.0903342	ZI253 only
