# Supplementary material for: Expansion and loss of sperm nuclear basic protein genes in Drosophila correspond with genetic conflicts between sex chromosomes
Source: eLife. 2023 Feb 10;12:e85249. doi: 10.7554/eLife.85249 (PMC9917458; doi:10.7554/eLife.85249)
Supplement: Supplementary file 8. — We performed fertility assays comparing CG30056 homozygous knockout flies with heterozygous controls. We also assayed fertility of knockout strains for the fertility-essential Mst77F gene, and the fertility-nonessential Tpl94D gene, together. We also documented the sex-ratios of the resulting progeny in Figure 2. Consistent with previous findings, we found that Mst77F knockout males are essentially sterile and Tpl94D knockout males were indistinguishable from their heterozygous controls. We found either no or weak evidence of fertility impairments in three different crosses with homozygous CG30056 knockout males. We observe no significant evidence of sex-ratio distortion that would suggest an X-versus-Y meiotic drive in progeny resulting from either CG30056, Mst77F, or Tpl94D knockout males. [file elife-85249-supp8.xlsx]

## Sheet: Sheet1
Supplementary file 8. The fertility assays of SNBP knockout and mutated flies.
CG30056	Replicates	1		2		3		4		5		6		7		8		9			10
Experiment		M	F	M	F	M	F	M	F	M	F	M	F	M	F	M	F	M	F	M	F	M	F
KO1/df (30585)	+	65	75	59	65	72	80	61	123	196	153	57	60	135	141	119	106	39	41	147	118	150	141
Control		M	F	M	F	M	F	M	F	M	F	M	F
KO1/SM6a	+	54	57	40	43	60	53	50	38	87	73	47	45
	CyO	48	50	42	36	66	44	54	67	73	85	36	56
CG30056	Replicates	1		2		3		4		5		6
Experiment		M	F	M	F	M	F	M	F	M	F	M	F
KO1/KO2	+	132	116	93	70	80	66	71	58	122	129	84	93
Control		M	F	M	F	M	F	M	F
KO1/CyO	+	47	54	74	69	79	82	62	67
	CyO	34	48	77	62	103	74	92	65
CG30056_sperm_exhaustion	Replicates	1		2		3		4		5		6		7		8		9		10		11		12
Experiment		M	F	M	F	M	F	M	F	M	F	M	F	M	F	M	F	M	F	M	F	M	F	M	F
KO1/KO2	+	177	169	294	244	287	254	200	165	116	140	239	222	214	204	192	189	217	177	159	149	192	153	107	95
Control		M	F	M	F	M	F	M	F	M	F	M	F	M	F	M	F	M	F
KO1/CyO	+ or RFP	138	131	268	222	204	168	221	200	227	195	164	143	235	210	214	187	221	216
Mst77F	Replicates	1		2		3		4		5		6		7		8
Experiment		M	F	M	F	M	F	M	F	M	F	M	F	M	F	M
delta1/Df1 (24956)	+	2	9	0	0	5	4	3	5	1	2	1	5	0	0
Control		M	F	M	F	M	F	M	F	M	F	M	F	M	F	M
delta1/TM6C, Sb	+	36	43	61	47	42	50	47	49	30	14	39	40	52	46	57	67
	Sb	31	44	51	42	42	44	52	55	27	20	40	37	49	43	51	59
Mst77F	Replicates	1		2		3		4		5		6		7		8
		M	F	M	F	M	F	M	F	M	F	M	F	M	F	M	F
delta1/Df2 (27369)	+	1	1	2	3	15	7	0	2	0	0	3	2	1	0	4	3
		M	F	M	F	M	F	M	F	M	F	M	F	M	F
delta1/TM6C, Sb	+	22	39	41	44	40	39	54	76	90	86	52	41	64	51
	Sb	33	42	43	39	30	28	53	63	82	85	47	37	56	66
Tpl94D	Replicates	1		2		3		4		5		6		7
		M	F	M	F	M	F	M	F	M	F	M	F	M	F
Mutant (26333)/ Df (7672)	+	61	67	138	130	111	102	78	87	73	95	99	115	68	91
		M	F	M	F	M	F	M	F	M	F
Mutant (26333)/ TM6B	+ or Tb	127	128	65	77	113	137	84	96	95	108
