# Supplementary material for: Expansion and loss of sperm nuclear basic protein genes in Drosophila correspond with genetic conflicts between sex chromosomes
Source: eLife. 2023 Feb 10;12:e85249. doi: 10.7554/eLife.85249 (PMC9917458; doi:10.7554/eLife.85249)
Supplement: Supplementary file 10. — We summarized the data from Supplementary file 8 and also manually curated data from some amplified SNBP genes using extra assemblies or Illumina reads (shown in red). To determine the chromosomal location of some amplified SNBP genes, we mapped male and female Illumina reads from different resources to the assemblies of 10 species (Supplementary file 13). This allowed us to assign contigs to the X or Y chromosome unambiguously. For D. melanogaster and D. simulans, we used assemblies with better contiguities (GCA_000778455.1 [Krsticevic et al., 2015] and GCA_004382185.1 [Chakraborty et al., 2021]). [file elife-85249-supp10.xlsx]

## Sheet: Summary
Supplementary file 10. The copy number and chromosome location of SNBP homologs using BLAST in each species.
Species	CG14835_A	CG14835_X/Y	CG14835_Un	CG30056_A	CG30056_X/Y	CG30056_Un	CG30356_A	CG30356_X/Y	CG30356_Un	CG31010_A	CG31010_X/Y	CG31010_Un	CG34269_A	CG34269_X/Y	CG34269_Un	CG42355_A	CG42355_X/Y	CG42355_Un	ddbt_A	ddbt_X/Y	ddbt_Un	Mst33A_A	Mst33A_X/Y	Mst33A_Un	Mst77F_A	Mst77F_X/Y	Mst77F_Un	Prtl99C_A	Prtl99C_X/Y	Prtl99C_Un	Prot_A	Prot_X/Y	Prot_Un	Tpl94D_A	Tpl94D_X/Y	Tpl94D_Un	tHMG_A	tHMG_X/Y	tHMG_Un	Note
D.simulans	1	NA	NA	1	NA	NA	1	NA	NA	1	NA	NA	1	NA	NA	1	NA	NA	1	NA	NA	1	NA	NA	1	NA	NA	1	NA	NA	2	NA	NA	1	NA	NA	1	56	NA	X-linked tHMG
D.parabipectinata	1	NA	NA	1	NA	NA	1	NA	NA	1	NA	NA	NA	NA	NA	2	NA	NA	1	NA	NA	1	NA	NA	NA	NA	NA	1	NA	NA	1	32	NA	1	NA	NA	1	NA	NA	Y-linked Prot
D.paulistorum.L06	NA	NA	NA	2	NA	NA	2	NA	NA	1	NA	NA	NA	1	NA	NA	NA	NA	NA	NA	NA	NA	NA	NA	NA	NA	NA	1	NA	NA	2	31	NA	NA	NA	NA	NA	NA	NA	sex-linked Prot
L.magnipectinata	1	NA	NA	2	1	NA	1	NA	NA	1	NA	NA	NA	NA	1	NA	NA	1	1	NA	2	NA	NA	NA	NA	NA	5	1	NA	1	28	1	26	NA	NA	1	9	1	NA	Prot and tHMG
D.subpulchrella.L1	1	NA	NA	1	NA	NA	1	NA	NA	1	NA	NA	1	NA	NA	1	NA	NA	1	NA	NA	1	NA	NA	1	NA	NA	1	26	NA	1	NA	NA	1	NA	NA	1	NA	NA	X-linked Prtl99C
D.melanogaster	1	NA	NA	1	NA	NA	1	NA	NA	1	NA	NA	1	NA	NA	1	NA	NA	1	NA	NA	1	NA	NA	1	18	NA	1	NA	NA	2	NA	NA	1	NA	NA	2	NA	NA	Mst77Y
D.mauritiana	1	NA	NA	1	NA	NA	1	NA	NA	1	NA	NA	1	NA	NA	1	NA	NA	1	NA	NA	1	NA	NA	1	NA	NA	1	NA	NA	3	NA	NA	1	NA	NA	2	14	NA	X-linked tHMG
D.willistoni.17	NA	NA	NA	1	NA	NA	1	NA	NA	1	NA	NA	1	NA	NA	1	NA	NA	NA	NA	NA	NA	NA	NA	NA	NA	NA	1	8	NA	3	14	NA	NA	NA	NA	NA	NA	NA	X-linked Prtl99C, Y-linked Prot
L.stackelbergi	1	NA	NA	1	NA	NA	1	NA	NA	1	NA	NA	2	NA	NA	1	NA	NA	NA	NA	NA	NA	NA	NA	1	NA	NA	NA	NA	NA	10	NA	NA	1	NA	NA	1	1	12	Prot and tHMG
D.bipectinata	1	NA	NA	1	NA	NA	1	NA	NA	1	NA	NA	NA	NA	NA	1	1	NA	1	NA	NA	1	NA	NA	1	NA	NA	1	NA	NA	1	12	NA	1	NA	NA	3	9	NA	X-linked tHMG, Y-linked Prot
D.insularis	NA	NA	NA	1	NA	NA	1	NA	NA	1	NA	NA	NA	1	NA	NA	NA	NA	NA	NA	NA	NA	NA	NA	NA	NA	NA	1	NA	NA	3	10	NA	NA	NA	NA	NA	NA	NA	sex-linked Prot
Z.camerounensis	1	NA	NA	1	NA	NA	1	NA	NA	1	NA	NA	NA	NA	NA	NA	NA	NA	1	NA	NA	NA	NA	NA	NA	NA	NA	1	1	NA	3	8	NA	NA	NA	NA	NA	NA	NA	sex-linked Prot
Z.ghesquierei	1	NA	NA	2	NA	NA	1	NA	NA	1	NA	NA	NA	NA	NA	NA	NA	NA	1	NA	NA	NA	NA	NA	NA	NA	NA	NA	NA	NA	1	7	NA	NA	NA	NA	NA	NA	NA	sex-linked Prot
D.elegans	1	NA	NA	1	NA	NA	1	NA	NA	1	NA	NA	1	NA	NA	1	NA	NA	1	NA	NA	1	NA	NA	2	NA	NA	1	NA	NA	NA	7	NA	1	NA	NA	1	NA	NA	X-linked Prot
L.varia	NA	NA	NA	1	NA	NA	NA	NA	NA	NA	NA	NA	1	NA	NA	NA	NA	NA	1	NA	NA	NA	NA	NA	NA	NA	NA	1	NA	NA	7	2	1	NA	NA	NA	NA	NA	NA	Prot
D.yakuba	1	NA	NA	1	NA	NA	1	NA	NA	1	NA	NA	1	NA	NA	1	NA	NA	1	NA	NA	1	7	NA	1	NA	NA	1	NA	NA	1	NA	NA	1	NA	NA	1	NA	NA	Y-linked Mst33A
D.obscura	2	NA	NA	1	NA	NA	1	NA	NA	1	5	NA	1	NA	NA	NA	NA	NA	1	NA	NA	NA	NA	NA	NA	NA	NA+N37	NA	NA	NA	6	NA	NA	NA	NA	NA	2	NA	NA	X-linked CG31010, autosomal ProtA
D.biarmipes	1	NA	NA	1	NA	NA	1	NA	NA	1	NA	NA	1	NA	NA	1	NA	NA	1	NA	NA	1	NA	NA	1	NA	NA	1	5	NA	1	NA	NA	1	NA	NA	1	NA	NA	X-linked Prtl99C
D.arawakana	2	5	NA	1	NA	NA	1	NA	NA	1	NA	NA	NA	NA	NA	NA	NA	NA	1	NA	NA	NA	NA	NA	NA	NA	NA	NA	NA	NA	2	NA	NA	NA	NA	NA	NA	NA	NA	X-linked CG14835
Z.indianus	1	NA	NA	1	NA	NA	1	NA	NA	1	NA	NA	NA	NA	NA	NA	NA	NA	1	NA	NA	NA	NA	NA	NA	NA	NA	NA	NA	NA	4	NA	NA	NA	NA	NA	NA	NA	NA	sex-linked Prot, varies on strains
D.rufa	NA	NA	NA	1	NA	NA	1	NA	NA	1	NA	NA	1	NA	NA	1	NA	NA	1	NA	NA	NA	NA	NA	1	NA	NA	NA	4	NA	2	1	NA	1	NA	NA	NA	NA	NA	X-linked Prtl99C
D.eugracilis	1	NA	NA	1	NA	NA	1	NA	NA	1	NA	NA	1	NA	NA	1	NA	NA	1	NA	NA	1	NA	NA	1	NA	NA	1	NA	NA	1	NA	NA	1	NA	NA	4	NA	NA	tHMG
D.ficusphila	1	NA	NA	1	NA	NA	NA	NA	NA	1	NA	NA	1	NA	NA	1	NA	NA	1	NA	NA	1	NA	NA	1	NA	NA	1	NA	NA	2	4	NA	1	NA	NA	NA	NA	NA	X-linked Prot
D.tropicalis	NA	NA	NA	1	NA	NA	1	NA	NA	1	NA	NA	NA	1	NA	1	NA	NA	NA	NA	NA	NA	NA	NA	NA	NA	NA	NA	4	NA	2	NA	NA	NA	NA	NA	NA	NA	NA	X-linked Prtl99C
Z.africanus	1	NA	NA	1	NA	NA	1	NA	NA	1	NA	NA	NA	NA	NA	NA	NA	NA	1	NA	NA	NA	NA	NA	NA	NA	NA	NA	NA	NA	3	3	NA	NA	NA	NA	NA	NA	NA	Prot
C.costata	NA	NA	NA	1	NA	NA	1	NA	NA	1	NA	NA	1	NA	NA	NA	1	NA	1	NA	NA	NA	NA	NA	1	NA	NA	NA	2	NA	3	NA	NA	2	NA	NA	1	NA	NA
D.americana	1	NA	NA	2	NA	NA	1	NA	NA	1	NA	NA	NA	NA	NA	NA	NA	NA	1	NA	NA	NA	NA	NA	NA	NA	NA	NA	NA	NA	3	NA	NA	NA	NA	NA	NA	NA	NA
D.virilis	1	NA	NA	2	NA	NA	1	NA	NA	1	NA	NA	NA	NA	NA	NA	NA	NA	1	1	NA	NA	NA	NA	NA	NA	NA	NA	NA	NA	3	NA	NA	NA	NA	NA	NA	NA	NA
D.grimshawi	1	NA	NA	1	NA	NA	1	NA	NA	1	NA	NA	NA	NA	NA	NA	NA	NA	1	NA	NA	NA	NA	NA	NA	NA	NA	NA	NA	NA	3	NA	NA	NA	NA	NA	NA	NA	NA
D.murphyi	1	NA	NA	1	NA	NA	1	NA	NA	1	NA	NA	NA	NA	NA	NA	NA	NA	1	NA	NA	NA	NA	NA	NA	NA	NA	NA	NA	NA	3	NA	NA	NA	NA	NA	NA	NA	NA
D.immigrans.kari17	1	NA	NA	1	NA	NA	1	NA	NA	1	NA	NA	NA	NA	NA	NA	NA	NA	NA	NA	NA	NA	NA	NA	NA	NA	NA	NA	NA	NA	3	NA	NA	NA	NA	NA	NA	NA	NA
D.cardini	1	3	NA	1	NA	NA	1	NA	NA	1	NA	NA	NA	NA	NA	NA	NA	NA	1	NA	NA	NA	NA	NA	NA	NA	NA	NA	NA	NA	2	NA	NA	NA	NA	NA	NA	NA	NA
D.funebris	1	NA	NA	1	NA	NA	1	NA	NA	1	NA	NA	NA	NA	NA	NA	NA	NA	1	NA	NA	NA	NA	NA	NA	NA	NA	NA	NA	NA	3	NA	NA	NA	NA	NA	NA	NA	NA
D.sp.mushsaotome	1	NA	NA	1	NA	NA	1	NA	NA	NA	NA	NA	NA	NA	NA	NA	NA	NA	1	NA	NA	NA	NA	NA	NA	NA	NA	NA	NA	NA	3	1	NA	NA	NA	NA	NA	NA	NA
Z.gabonicus	1	NA	NA	1	NA	NA	1	NA	NA	1	NA	NA	NA	NA	NA	NA	NA	NA	1	NA	NA	NA	NA	NA	NA	NA	NA	NA	NA	NA	3	NA	NA	NA	NA	NA	NA	NA	NA
Z.nigranus	1	NA	NA	1	NA	NA	1	NA	NA	1	NA	NA	NA	NA	NA	NA	NA	NA	1	NA	NA	NA	NA	NA	NA	NA	NA	NA	NA	NA	3	2	NA	NA	NA	NA	NA	NA	NA
Z.lachaisei	1	NA	NA	1	NA	NA	1	NA	NA	1	NA	NA	NA	NA	NA	NA	NA	NA	1	NA	NA	NA	NA	NA	NA	NA	NA	NA	NA	NA	3	NA	NA	NA	NA	NA	NA	NA	NA
Z.davidi	1	NA	NA	1	NA	NA	1	NA	NA	1	NA	NA	NA	NA	NA	NA	NA	NA	1	NA	NA	NA	NA	NA	NA	NA	NA	NA	NA	NA	3	NA	NA	NA	NA	NA	NA	NA	NA
Z.taronus	1	NA	NA	1	NA	NA	1	NA	NA	1	NA	NA	NA	NA	NA	NA	NA	NA	1	NA	NA	NA	NA	NA	NA	NA	NA	NA	NA	NA	3	1	1	NA	NA	NA	NA	NA	NA
Z.inermis	1	NA	NA	2	NA	NA	1	NA	NA	1	NA	NA	NA	NA	NA	NA	NA	NA	1	2	NA	NA	NA	NA	NA	NA	NA	NA	NA	NA	3	NA	NA	NA	NA	NA	NA	NA	NA
Z.kolodkinae	1	NA	NA	1	NA	NA	1	NA	NA	1	NA	NA	NA	NA	NA	NA	NA	NA	1	3	NA	NA	NA	NA	NA	NA	NA	NA	NA	NA	3	NA	NA	NA	NA	NA	NA	NA	NA
D.persimilis	2	NA	NA	1	NA	NA	1	NA	NA	1	NA	NA	NA	1	NA	NA	NA	NA	NA	1	NA	NA	NA	NA	NA	NA	NA	1	NA	NA	3	NA	NA	NA	1	NA	3	NA	NA
D.pseudoobscura	2	NA	NA	1	NA	NA	1	NA	NA	1	NA	NA	NA	1	NA	NA	NA	NA	NA	1	NA	NA	NA	NA	NA	NA	NA	NA	NA	NA	3	NA	NA	NA	1	NA	3	NA	NA
D.m.malerkotliana	1	NA	NA	1	NA	NA	1	NA	NA	1	NA	NA	NA	NA	NA	3	NA	NA	1	NA	NA	1	NA	NA	1	NA	NA	1	NA	NA	3	1	NA	1	NA	NA	1	NA	NA
D.triauraria	NA	NA	NA	1	NA	NA	2	NA	NA	1	NA	NA	1	NA	NA	1	NA	NA	1	NA	NA	NA	NA	NA	1	NA	NA	NA	3	NA	2	NA	NA	1	NA	NA	NA	NA	NA
D.spaffchauvacae	NA	NA	NA	1	NA	NA	3	NA	NA	1	NA	NA	1	1	NA	1	NA	NA	1	NA	NA	NA	NA	NA	NA	NA	NA	NA	NA	NA	2	NA	NA	1	NA	NA	NA	NA	NA
D.takahashii	1	NA	NA	1	NA	NA	1	NA	NA	1	NA	NA	1	NA	NA	1	1	NA	1	NA	NA	2	1	NA	2	NA	NA	NA	3	NA	1	NA	NA	NA	NA	NA	NA	NA	NA
D.carrolli	1	NA	NA	1	NA	NA	1	NA	NA	1	NA	NA	1	1	NA	1	NA	NA	1	NA	NA	2	NA	NA	1	NA	NA	3	NA	NA	1	NA	NA	1	NA	NA	NA	NA	NA
D.rhopaloa	1	NA	NA	1	NA	NA	1	NA	NA	1	NA	NA	2	NA	NA	1	NA	NA	1	NA	NA	2	NA	NA	1	NA	NA	1	3	NA	1	NA	NA	1	NA	NA	NA	NA	NA
D.equinoxialis	NA	NA	NA	1	1	NA	1	NA	NA	1	NA	NA	NA	1	NA	1	NA	NA	NA	NA	NA	NA	NA	NA	NA	NA	NA	3	NA	NA	2	NA	NA	NA	NA	NA	NA	NA	NA
D.sturtevanti	NA	NA	NA	1	NA	NA	1	NA	NA	1	NA	NA	1	NA	NA	NA	NA	NA	1	NA	NA	1	NA	NA	NA	NA	NA	1	NA	NA	3	NA	NA	NA	NA	NA	NA	NA	NA
D.wassermani	NA	NA	NA	NA	NA	2	NA	NA	NA	NA	NA	1	NA	NA	1	NA	NA	NA	NA	NA	1	NA	NA	NA	NA	NA	NA	NA	NA	NA	NA	NA	NA	NA	NA	NA	NA	NA	NA
D.bromeliae	NA	NA	1	NA	NA	2	NA	NA	1	NA	NA	1	NA	NA	NA	NA	NA	NA	NA	NA	1	NA	NA	NA	NA	NA	NA	NA	NA	NA	NA	NA	2	NA	NA	NA	NA	NA	NA
D.mojavensis	1	NA	NA	2	NA	NA	1	NA	NA	1	NA	NA	NA	NA	NA	NA	NA	NA	1	NA	NA	NA	NA	NA	NA	NA	NA	NA	NA	NA	2	NA	NA	NA	NA	NA	NA	NA	NA
D.repleta	1	1	NA	1	NA	NA	1	NA	NA	1	NA	NA	NA	NA	NA	NA	NA	NA	1	NA	NA	NA	NA	NA	NA	NA	NA	NA	NA	NA	2	NA	NA	NA	NA	NA	NA	NA	NA
D.sproati	1	NA	NA	1	NA	NA	1	NA	NA	1	NA	NA	NA	NA	NA	NA	NA	NA	1	NA	NA	NA	NA	NA	NA	NA	NA	NA	NA	NA	2	NA	NA	NA	NA	NA	NA	NA	NA
D.immigrans.fk05	1	NA	NA	1	NA	NA	1	NA	NA	1	NA	NA	NA	NA	NA	NA	NA	NA	NA	NA	NA	NA	NA	NA	NA	NA	NA	NA	NA	NA	2	NA	NA	NA	NA	NA	NA	NA	NA
D.pruinosa	1	NA	NA	2	NA	NA	1	NA	NA	1	NA	NA	NA	NA	NA	NA	NA	NA	NA	NA	NA	NA	NA	NA	NA	NA	NA	NA	NA	NA	1	NA	NA	NA	NA	NA	NA	NA	NA
D.dunni	1	NA	NA	2	NA	NA	1	NA	NA	1	NA	NA	NA	NA	NA	NA	NA	NA	1	NA	NA	NA	NA	NA	NA	NA	NA	NA	NA	NA	2	NA	NA	NA	NA	NA	NA	NA	NA
D.quadrilineata	NA	NA	NA	1	NA	NA	1	NA	NA	1	NA	NA	NA	NA	NA	NA	NA	NA	1	NA	NA	NA	NA	NA	NA	NA	NA	NA	NA	NA	2	NA	NA	NA	NA	NA	NA	NA	NA
Z.vittiger	1	NA	NA	1	NA	NA	1	NA	NA	1	NA	NA	NA	NA	NA	NA	NA	NA	1	NA	NA	NA	NA	NA	NA	NA	NA	NA	NA	NA	2	NA	NA	NA	NA	NA	NA	NA	NA
Z.capensis	1	NA	NA	1	NA	NA	1	NA	NA	1	NA	NA	NA	NA	NA	NA	NA	NA	1	NA	NA	NA	NA	NA	NA	NA	NA	NA	NA	NA	2	NA	NA	NA	NA	NA	NA	NA	NA
Z.tsacasi	1	NA	NA	1	NA	NA	1	NA	NA	1	NA	NA	1	NA	NA	NA	NA	NA	1	1	NA	NA	NA	NA	NA	NA	NA	NA	NA	NA	2	NA	NA	NA	NA	NA	NA	NA	NA
Z.tsacasi.car7-4	1	NA	NA	1	NA	NA	1	NA	NA	1	NA	NA	1	NA	NA	NA	NA	NA	1	1	NA	NA	NA	NA	NA	NA	NA	NA	NA	NA	2	NA	NA	NA	NA	NA	NA	NA	NA
D.repletoides	NA	1	NA	1	NA	NA	1	NA	NA	1	NA	NA	NA	NA	NA	1	NA	NA	NA	6	NA	NA	NA	NA	NA	NA	NA	NA	NA	NA	2	NA	NA	NA	NA	NA	NA	NA	NA	X-linked ddbt
D.subobscura	1	NA	NA	1	NA	NA	1	NA	NA	1	NA	NA	1	NA	NA	NA	NA	NA	1	NA	NA	NA	NA	NA	NA	NA	NA	NA	NA	NA	2	NA	NA	1	NA	NA	2	NA	NA
D.bocqueti	NA	NA	NA	1	NA	NA	1	NA	NA	1	NA	NA	1	NA	NA	1	NA	NA	1	NA	NA	NA	NA	NA	NA	NA	NA	NA	NA	NA	2	NA	NA	1	NA	NA	NA	NA	NA
D.jambulina	NA	NA	NA	1	NA	NA	1	NA	NA	1	NA	NA	1	NA	NA	1	NA	NA	1	NA	NA	NA	NA	NA	NA	NA	NA	NA	NA	NA	2	NA	NA	1	NA	NA	NA	NA	NA
D.kikkawai	NA	NA	NA	1	NA	NA	1	NA	NA	1	NA	NA	NA	NA	NA	NA	NA	NA	1	NA	NA	NA	NA	NA	NA	NA	NA	NA	NA	NA	2	NA	NA	1	NA	NA	NA	NA	NA
D.sechellia	1	NA	NA	1	NA	NA	1	NA	NA	1	NA	NA	1	NA	NA	1	NA	NA	1	NA	NA	1	NA	NA	1	NA	NA	1	NA	NA	2	NA	NA	1	NA	NA	1	1	NA
D.kurseongensis	1	NA	NA	1	NA	NA	1	NA	NA	1	NA	NA	1	NA	NA	1	NA	NA	1	NA	NA	2	1	NA	1	NA	NA	1	1	NA	1	NA	NA	1	NA	NA	NA	NA	NA
D.fuyamai	1	NA	NA	1	NA	NA	1	NA	NA	1	NA	NA	1	NA	NA	1	NA	NA	1	NA	NA	2	NA	NA	NA	NA	NA	1	2	NA	1	NA	NA	1	NA	NA	NA	NA	NA
D.neocordata	NA	NA	NA	1	NA	NA	1	NA	NA	1	NA	NA	NA	1	NA	NA	NA	NA	1	NA	NA	1	NA	NA	NA	NA	NA	NA	NA	NA	2	NA	NA	NA	NA	NA	NA	NA	NA
D.prosaltans	NA	NA	NA	1	NA	NA	1	NA	NA	1	NA	NA	NA	1	NA	NA	NA	NA	1	NA	NA	NA	NA	NA	NA	NA	NA	2	NA	NA	2	NA	NA	NA	NA	NA	NA	NA	NA
D.saltans	NA	NA	NA	1	NA	NA	1	NA	NA	1	NA	NA	NA	1	NA	NA	NA	NA	1	NA	NA	NA	NA	NA	NA	NA	NA	1	NA	NA	2	NA	NA	NA	NA	NA	NA	NA	NA
S.pallida	1	NA	NA	1	NA	NA	1	NA	NA	1	NA	NA	NA	NA	NA	NA	NA	NA	1	NA	NA	NA	NA	NA	NA	NA	NA	NA	NA	NA	1	1	NA	NA	NA	NA	NA	NA	NA
S.montana	1	NA	NA	1	NA	NA	1	NA	NA	1	NA	NA	NA	NA	NA	NA	NA	NA	1	NA	NA	NA	NA	NA	NA	NA	NA	NA	NA	NA	1	NA	NA	NA	NA	NA	NA	NA	NA
D.ananassae	1	NA	NA	1	NA	NA	1	NA	NA	1	NA	NA	NA	NA	NA	1	NA	NA	1	NA	NA	1	NA	NA	1	NA	NA	1	NA	NA	1	NA	NA	1	NA	NA	1	NA	NA
D.m.pallens	1	NA	NA	1	NA	NA	1	NA	NA	1	NA	NA	NA	NA	NA	1	1	NA	1	NA	NA	1	NA	NA	1	NA	NA	1	NA	NA	1	1	NA	1	NA	NA	1	NA	NA
D.p.nigrens	1	NA	NA	1	NA	NA	1	NA	NA	1	NA	NA	NA	NA	NA	1	NA	NA	1	NA	NA	1	NA	NA	1	NA	NA	1	NA	NA	1	NA	NA	1	NA	NA	1	NA	NA
D.p.pseudoananassae	1	NA	NA	1	NA	NA	1	NA	NA	1	NA	NA	NA	NA	NA	1	NA	NA	1	NA	NA	1	NA	NA	1	NA	NA	1	NA	NA	1	NA	NA	1	NA	NA	1	NA	NA
D.ercepeae	1	NA	NA	1	NA	NA	1	NA	NA	1	NA	NA	NA	NA	NA	1	NA	NA	1	NA	NA	1	NA	NA	1	NA	NA	1	NA	NA	1	NA	NA	1	NA	NA	1	NA	NA
D.erecta	1	NA	NA	1	NA	NA	1	NA	NA	1	NA	NA	1	NA	NA	1	NA	NA	1	NA	NA	1	NA	NA	1	NA	NA	1	NA	NA	1	NA	NA	1	NA	NA	1	NA	NA
D.teissieri.2733	1	NA	NA	1	NA	NA	1	NA	NA	1	NA	NA	1	NA	NA	1	NA	NA	1	NA	NA	1	NA	NA	1	NA	NA	1	NA	NA	1	NA	NA	1	NA	NA	1	NA	NA
*The red colors represent the number using other assemblies (more contiguous) in the same species.
**The blue colors represent the numbers that are manually curated using other evidence.
