# Supplementary material for: Expansion and loss of sperm nuclear basic protein genes in Drosophila correspond with genetic conflicts between sex chromosomes
Source: eLife. 2023 Feb 10;12:e85249. doi: 10.7554/eLife.85249 (PMC9917458; doi:10.7554/eLife.85249)
Supplement: Supplementary file 11. — We analyzed tHMG copies from D. simulans clade species to infer their selective pressures (Figure 4). We compared branches with different protein evolution rates using likelihood ratio tests (CodonFreq = 2). Our models include the null model (same protein evolution rate across branches), a model where all X-chromosome branches share a rate that is different from the rate on all other branches ('all X'), and a model where the early duplication branches on both the X-linked copies and the parental copy share a rate that is different from all other branches ('Duplication'). We compared two models with all sites that share the same protein evolution rate (fix_omega = 1) and various evolution rates (fix_omega = 0), and did not find evidence of positive selection. The duplication model fits best across all models, so we also used this model to conduct a branch-site test. No evidence for positive selection was using the branch-site test. [file elife-85249-supp11.xlsx]

## Sheet: Sheet1
Supplementary file 11. PAML analyses reveal different selection forces in tHMG duplicates of D. simulans clade species.
CodonFreq=2
	w0	w1	l		LRT
Null	0.395		-1507.11
All X	0.3665		-1506.26	1.71835	0.189906
one X	0.3609	1.3392	-1504.79	4.64108	0.0312153
Duplication	0.3492	1.614	-1503.47	7.27867	0.00697783	This model is applied for the branch-site test
Duplication Null	0.3489	1	-1503.79
Duplication	0.3492	1.614	-1503.47	0.631496	0.426807
Branch-site	w0	w1	l		LRT
H0			-1492.99
H1			-1492.28	1.42555	0.232492
H0
MLEs of dN/dS (w) for site classes (K=4)
site class 0 1 2a 2b
proportion 0.41174 0.30436 0.16324 0.12066
background w 0.17332 1.00000 0.17332 1.00000
foreground w 0.17332 1.00000 3.19142 3.19142
