# Supplementary material for: Expansion and loss of sperm nuclear basic protein genes in Drosophila correspond with genetic conflicts between sex chromosomes
Source: eLife. 2023 Feb 10;12:e85249. doi: 10.7554/eLife.85249 (PMC9917458; doi:10.7554/eLife.85249)
Supplement: Supplementary file 12. — We report the chromosomal locations of each SNBP gene in species with neo-sex chromosomes illustrated in Figure 5. [file elife-85249-supp12.xlsx]

## Sheet: Sheet1
Supplementary file 12. Location and degeneration of SNBP genes in species with neo-sex chromosomes.
		D. pseudoobscura group species												D. willisonti group species										D. repletoides group species
Gene	Muller in D. melanogaster	D. pseudoobscura	D. persimilis	D.miranda	D. lowei	Dath_EA	Dath_EB	D. azteca	D.subobscura	D.guanche	D.obscura	D.bifasciata		D.sturtevanti	D.neocordata	D.prosaltans	D.saltans	D.insularis	D.tropicalis	D.willistoni.17	D.equinoxialis	D.paulistorum.L06		D.repletoides
Mst33A	B	-	-	-	-	-	-	-	-	-	-	-		B?	B?	-	-	-	-	-	-	-		-
CG30056	C	C	C	C	C	C	C	C	C	C	C	C		C	C	C	C	C	C	C	C	C		C
CG30356	C	C	C	C, expand on Y	C	C	C	C	C	C	C	C		C	E	C	C	C	C	C	C	C		C
Prot	C	B	B	B	B	B	B	B	B	B	B	B		B	B	B	B	B	B	B	B	B		B
Mst77F	D	-	-	-	-	-	-	-	-	D*	-	D*		-	-	-	-	-	-	-	-	-		-
ddbt	D	D	D	D	D	D	D	D	D	D	B	D		E	E	E	E	degenerate	degenerate	degenerate	degenerate	degenerate		D
CG14835	D	E	E	E	E	A*	A or D	A or E, many copies	E	E	E	E		degenerate	degenerate	degenerate	degenerate	degenerate	degenerate	degenerate	degenerate	degenerate		D
CG34269	D	D	D	D	D	D	D	D	D	D	D	D		D	D	D	D	D	D	D	D	D		-
CG42355	D	-	-	-	-	-	-	-	-	-	-	-		-	-	-	-	-	-	-	-	-		-
Prtl99C	E	B	B	B	B, many copies	B	B	B	D	D	B	B		-	-	E	E	E	D	E	E	E		-
Tpl94D	E	A	A	A	B	B	B	B	E	E	E	E		-	-	-	-	-	-	-	-	-		-
tHMG	E	E	E	E	E	E	E	E and many	E	E	E	E		-	-	-	-	-	-	-	-	-		-
CG31010	E	E	E	E	E	E	E	E	E	E	E	E		E	E	E	E	E	E	E	E	E		E
* in contigs with few contigs to indicate their location
- no homolog in the ancester
